# Supplementary material for: Knowledge, attitudes and practices regarding neonatal jaundice among caregivers in a tertiary health facility in Ghana
Source: PLoS One. 2021 Jun 4;16(6):e0251846. doi: 10.1371/journal.pone.0251846 (PMC8177863; doi:10.1371/journal.pone.0251846)
Supplement: S1 Dataset — (XLSX) [file pone.0251846.s001.xlsx]

## Sheet: Sheet1
qid	age	other_age	sex	rel	marr	edu	occup	ethn	par	anc	resid	edu_nnj	diagnosis	q13	q14	q15	q16	q17	q18	q19	q20	q21	q22	q23	q24	q25	q26	q27	q28	q29	q30	q31	q32	q33	q34	q35	q36	q37	q38	q39	q40	q41	q42	q43	q44	q45	q46	q47	q48
105	18-24 years		Female	Christian	Single	Tertiary	Student/Unemployed	Akan	None	<4 visits	Urban	No	0	Strongly Agree	Agree	Strongly Agree	Agree	Strongly Disagree	Strongly Disagree	Agree	Undecided	Agree	Strongly Agree	Agree	Disagree	Disagree	Strongly Agree	Agree	Agree	Strongly Agree	Strongly Agree	Disagree	Strongly Disagree	Strongly Agree	Strongly Agree	Strongly Disagree	Strongly Disagree	Strongly Agree	Strongly Agree	Strongly Agree	Strongly Agree	Agree	Strongly Agree	Disagree	Strongly Agree	Disagree	Strongly Disagree	Disagree	Agree
62	41-46 years		Female	Muslim	Married	Basic	Self/Private employed	Others	More than two	4+ visits	Rural	Yes	0	Agree	Agree	Agree	Undecided	Disagree	Disagree	Undecided	Undecided	Undecided	Undecided	Agree	Undecided	Undecided	Undecided	Undecided	Undecided	Agree	Agree	Undecided	Undecided	Agree	Agree	Disagree	Undecided	Agree	Agree	Agree	Strongly Agree	Agree	Agree	Agree	Agree	Agree	Undecided	Undecided	Agree
61	25-40 years		Male	Christian	Married	Tertiary	Self/Private employed	Akan	Two	<4 visits	Urban	Yes	1	Strongly Agree	Agree	Agree	Undecided	Disagree	Undecided	Undecided	Undecided	Undecided	Agree	Agree	Disagree	Agree	Undecided	Undecided	Undecided	Agree	Agree	Agree	Undecided	Agree	Agree	Agree	Agree	Agree	Agree	Agree	Undecided	Agree	Agree	Agree	Agree	Agree	Undecided	Agree	Agree
60	25-40 years		Male	Christian	Married	Basic	Self/Private employed	Ewe	One	<4 visits	Urban	No	0	Agree	Undecided	Undecided	Undecided	Disagree	Disagree	Disagree	Strongly Disagree	Strongly Disagree	Agree	Agree	Strongly Disagree	Strongly Disagree	Strongly Disagree	Strongly Disagree	Strongly Disagree	Agree	Agree	Strongly Disagree	Undecided	Agree	Agree	Agree	Agree	Agree	Agree	Undecided	Undecided	Agree	Agree	Agree	Agree	Agree	Undecided	Agree	Agree
59	18-24 years		Female	Christian	Single	Basic	Unknown	Ewe	More than two	4+ visits	Rural	No	0	Strongly Agree	Undecided	Disagree	Undecided	Disagree	Undecided	Undecided	Undecided	Undecided	Agree	Agree	Undecided	Undecided	Undecided	Undecided	Undecided	Agree	Agree	Undecided	Undecided	Agree	Agree	Disagree	Agree	Agree	Agree	Undecided	Undecided	Agree	Agree	Agree	Undecided	Agree	Strongly Disagree	Disagree	Undecided
58	25-40 years		Female	Christian	Married	Tertiary	Public servant	Akan	One	4+ visits	Urban	Yes	0	Strongly Agree	Agree	Agree	Undecided	Disagree	Undecided	Agree	Agree	Undecided	Agree	Agree	Undecided	Agree	Undecided	Undecided	Undecided	Strongly Agree	Strongly Agree	Undecided	Agree	Agree	Agree	Disagree	Agree	Agree	Agree	Agree	Agree	Agree	Agree	Agree	Strongly Agree	Agree	Disagree	Disagree	Agree
57	25-40 years		Female	Christian	Single	Secondary	Public servant	Ewe	None	<4 visits	Estate	Yes	0	Strongly Agree	Strongly Agree	Strongly Agree	Disagree	Strongly Disagree	Disagree	Agree	Agree	Disagree	Strongly Agree	Agree	Undecided	Disagree	Disagree	Disagree	Undecided	Strongly Agree	Strongly Agree	Undecided	Agree	Strongly Agree	Strongly Agree	Strongly Disagree	Strongly Agree	Agree	Agree	Agree	Strongly Disagree	Strongly Agree	Agree	Agree	Agree	Strongly Agree	Strongly Disagree	Undecided	Agree
56	41-46 years		Female	Christian	Divorced/Separated	Basic	Self/Private employed	Ga	More than two	4+ visits	Rural	No	0	Strongly Agree	Undecided	Agree	Disagree	Disagree	Disagree	Disagree	Disagree	Agree	Agree	Agree	Agree	Agree	Agree	Strongly Disagree	Disagree	Strongly Agree	Strongly Agree	Undecided	Strongly Agree	Strongly Agree	Strongly Agree	Agree	Agree	Agree	Agree	Agree	Undecided	Strongly Agree	Agree	Agree	Agree	Strongly Agree	Disagree	Agree	Agree
54	25-40 years		Female	Christian	Single	Secondary	Unknown	Others	None	<4 visits	Urban	No	0	Strongly Agree	Disagree	Agree	Agree	Agree	Undecided	Agree	Agree	Agree	Agree	Agree	Agree	Agree	Agree	Agree	Undecided	Agree	Agree	Agree	Agree	Undecided	Agree	Agree	Agree	Agree	Agree	Agree	Undecided	Agree	Agree	Agree	Agree	Agree	Disagree	Agree	Agree
55	25-40 years		Female	Christian	Married	Basic	Self/Private employed	Ewe	More than two	4+ visits	Rural	Yes	0	Strongly Agree	Agree	Undecided	Undecided	Undecided	Undecided	Undecided	Undecided	Undecided	Agree	Agree	Disagree	Disagree	Agree	Undecided	Undecided	Strongly Agree	Strongly Agree	Undecided	Undecided	Strongly Agree	Agree	Strongly Disagree	Undecided	Agree	Agree	Agree	Undecided	Agree	Strongly Agree	Strongly Agree	Strongly Agree	Strongly Agree	Strongly Disagree	Disagree	Agree
52	25-40 years		Female	Christian	Married	Secondary	Self/Private employed	Ewe	Two	4+ visits	Estate	Yes	0	Agree	Disagree	Disagree	Undecided	Strongly Disagree	Strongly Disagree	Agree	Agree	Undecided	Agree	Agree	Undecided	Agree	Agree	Undecided	Undecided	Agree	Undecided	Agree	Disagree	Undecided	Disagree	Undecided	Disagree	Agree	Agree	Agree	Undecided	Agree	Agree	Undecided	Undecided	Undecided	Disagree	Disagree	Undecided
53	25-40 years		Female	Christian	Married	Tertiary	Public servant	Ewe	One	4+ visits	Estate	Yes	0	Agree	Disagree	Undecided	Disagree	Strongly Disagree	Strongly Disagree	Undecided	Strongly Agree	Strongly Agree	Agree	Agree	Disagree	Strongly Agree	Agree	Agree	Strongly Agree	Strongly Agree	Strongly Agree	Strongly Agree	Undecided	Undecided	Agree	Strongly Disagree	Strongly Disagree	Disagree	Strongly Agree	Strongly Agree	Strongly Disagree	Agree	Strongly Agree	Strongly Disagree	Strongly Agree	Disagree	Strongly Disagree	Disagree	Agree
50	18-24 years		Female	Christian	Married	Secondary	Unknown	Akan	One	4+ visits	Estate	Yes	1	Agree	Agree	Agree	Agree	Agree	Undecided	Undecided	Undecided	Disagree	Agree	Disagree	Agree	Disagree	Undecided	Agree	Disagree	Agree	Agree	Agree	Agree	Undecided	Undecided	Undecided	Agree	Disagree	Agree	Undecided	Agree	Agree	Agree	Agree	Agree	Agree	Agree	Agree	Agree
51	>46 years	49	Female	Christian	Single	Tertiary	Unknown	Ewe	Two	4+ visits	Rural	No	0	Agree	Undecided	Agree	Agree	Undecided	Agree	Disagree	Agree	Agree	Agree	Agree	Disagree	Agree	Agree	Agree	Undecided	Agree	Agree	Undecided	Undecided	Disagree	Agree	Disagree	Agree	Agree	Agree	Agree	Agree	Agree	Agree	Agree	Agree	Disagree	Disagree	Agree	Agree
47	25-40 years		Female	Christian	Married	Tertiary	Unknown	Akan	Two	4+ visits	Rural	No	1	Strongly Agree	Undecided	Disagree	Undecided	Agree	Disagree	Agree	Agree	Agree	Agree	Agree	Agree	Agree	Agree	Strongly Agree	Undecided	Agree	Disagree	Undecided	Disagree	Disagree	Disagree	Disagree	Undecided	Agree	Agree	Agree	Agree	Agree	Agree	Agree	Undecided	Undecided	Disagree	Agree	Disagree
48	25-40 years		Female	Christian	Married	Secondary	Self/Private employed	Ewe	Two	4+ visits	Rural	No	0	Agree	Agree	Undecided	Undecided	Undecided	Undecided	Agree	Agree	Agree	Agree	Agree	Agree	Agree	Agree	Agree	Undecided	Agree	Undecided	Undecided	Undecided	Undecided	Disagree	Agree	Agree	Agree	Agree	Agree	Undecided	Agree	Agree	Agree	Agree	Agree	Disagree	Agree	Agree
49	25-40 years		Female	Christian	Married	Tertiary	Public servant	Ewe	One	4+ visits	Rural	Yes	1	Agree	Undecided	Agree	Undecided	Agree	Agree	Disagree	Undecided	Disagree	Disagree	Disagree	Agree	Undecided	Agree	Disagree	Agree	Disagree	Agree	Undecided	Agree	Undecided	Disagree	Undecided	Undecided	Agree	Undecided	Undecided	Agree	Disagree	Disagree	Disagree	Disagree	Undecided	Undecided	Undecided	Disagree
45	41-46 years		Female	Christian	Married	Secondary	Self/Private employed	Ga	More than two	4+ visits	Rural	Yes	0	Strongly Agree	Disagree	Agree	Undecided	Disagree	Disagree	Agree	Agree	Agree	Agree	Strongly Agree	Agree	Agree	Agree	Agree	Agree	Agree	Agree	Agree	Undecided	Undecided	Agree	Disagree	Agree	Agree	Agree	Agree	Undecided	Strongly Agree	Strongly Agree	Strongly Agree	Strongly Agree	Agree	Disagree	Agree	Strongly Agree
46	18-24 years		Female	Christian	Married	Tertiary	Unknown	Akan	Two	4+ visits	Urban	Yes	1	Agree	Undecided	Agree	Agree	Disagree	Disagree	Disagree	Agree	Agree	Strongly Agree	Agree	Strongly Agree	Undecided	Strongly Agree	Agree	Undecided	Agree	Agree	Undecided	Undecided	Undecided	Agree	Agree	Disagree	Disagree	Agree	Agree	Undecided	Strongly Agree	Strongly Agree	Strongly Agree	Agree	Undecided	Disagree	Agree	Agree
44	18-24 years		Female	Christian	Single	Tertiary	Student/Unemployed	Akan	None	<4 visits	Urban	Yes	0	Agree	Undecided	Undecided	Undecided	Disagree	Agree	Strongly Agree	Agree	Agree	Agree	Undecided	Undecided	Agree	Undecided	Undecided	Undecided	Agree	Agree	Undecided	Undecided	Undecided	Undecided	Disagree	Agree	Agree	Agree	Agree	Disagree	Agree	Agree	Agree	Agree	Undecided	Disagree	Disagree	Disagree
43	18-24 years		Female	Muslim	Single	Secondary	Unknown	Ewe	One	4+ visits	Rural	No	0	Disagree	Strongly Agree	Undecided	Strongly Disagree	Undecided	Agree	Disagree	Undecided	Agree	Disagree	Strongly Agree	Agree	Disagree	Undecided	Disagree	Undecided	Agree	Undecided	Disagree	Undecided	Agree	Undecided	Undecided	Disagree	Agree	Disagree	Agree	Undecided	Strongly Disagree	Undecided	Agree	Undecided	Strongly Agree	Undecided	Disagree	Agree
40	25-40 years		Female	Christian	Married	Tertiary	Self/Private employed	Akan	One	4+ visits	Rural	No	0	Strongly Agree	Strongly Agree	Agree	Undecided	Agree	Undecided	Agree	Agree	Agree	Strongly Agree	Strongly Agree	Strongly Agree	Strongly Agree	Agree	Strongly Agree	Agree	Disagree	Agree	Agree	Disagree	Undecided	Agree	Undecided	Undecided	Undecided	Undecided	Undecided	Agree	Agree	Disagree	Disagree	Agree	Disagree	Agree	Disagree	Agree
41	41-46 years		Female	Muslim	Married	Secondary	Self/Private employed	Others	Two	4+ visits	Rural	No	1	Agree	Undecided	Agree	Agree	Strongly Agree	Disagree	Agree	Agree	Agree	Agree	Agree	Undecided	Agree	Agree	Agree	Undecided	Agree	Undecided	Agree	Undecided	Undecided	Undecided	Agree	Agree	Strongly Agree	Strongly Agree	Agree	Disagree	Agree	Strongly Agree	Strongly Agree	Agree	Agree	Undecided	Disagree	Agree
42	41-46 years		Female	Christian	Married	Tertiary	Unknown	Ewe	Two	4+ visits	Rural	No	0	Disagree	Undecided	Agree	Agree	Strongly Agree	Strongly Agree	Agree	Agree	Agree	Agree	Strongly Agree	Strongly Agree	Strongly Agree	Strongly Agree	Agree	Agree	Strongly Agree	Strongly Agree	Agree	Agree	Agree	Agree	Strongly Agree	Undecided	Agree	Undecided	Undecided	Disagree	Agree	Agree	Agree	Agree	Agree	Undecided	Undecided	Strongly Agree
38	41-46 years		Female	Christian	Divorced/Separated	Tertiary	Self/Private employed	Ewe	One	4+ visits	Urban	Yes	0	Agree	Disagree	Undecided	Strongly Agree	Undecided	Agree	Disagree	Strongly Disagree	Agree	Disagree	Agree	Strongly Agree	Disagree	Undecided	Strongly Disagree	Disagree	Strongly Agree	Disagree	Undecided	Strongly Disagree	Undecided	Strongly Disagree	Agree	Undecided	Agree	Disagree	Undecided	Strongly Agree	Strongly Disagree	Undecided	Disagree	Strongly Disagree	Undecided	Agree	Disagree	Agree
39	25-40 years		Female	Christian	Married	Secondary	Student/Unemployed	Akan	More than two	4+ visits	Urban	No	1	Strongly Disagree	Undecided	Undecided	Disagree	Strongly Disagree	Agree	Undecided	Agree	Undecided	Disagree	Disagree	Agree	Undecided	Strongly Disagree	Undecided	Undecided	Strongly Disagree	Disagree	Disagree	Disagree	Undecided	Undecided	Disagree	Agree	Disagree	Agree	Undecided	Undecided	Agree	Agree	Strongly Agree	Disagree	Undecided	Undecided	Disagree	Undecided
37	18-24 years		Female	Christian	Divorced/Separated	Tertiary	Self/Private employed	Ewe	None	<4 visits	Urban	No	0	Undecided	Undecided	Agree	Agree	Agree	Agree	Undecided	Undecided	Undecided	Undecided	Undecided	Undecided	Undecided	Undecided	Agree	Strongly Agree	Strongly Agree	Strongly Agree	Strongly Agree	Undecided	Undecided	Undecided	Undecided	Agree	Agree	Agree	Disagree	Agree	Undecided	Undecided	Undecided	Undecided	Disagree	Disagree	Agree	Strongly Disagree
36	18-24 years		Female	Christian	Single	Secondary	Unknown	Ewe	None	<4 visits	Estate	Yes	0	Disagree	Agree	Undecided	Strongly Disagree	Undecided	Disagree	Agree	Undecided	Strongly Agree	Undecided	Strongly Disagree	Undecided	Disagree	Agree	Disagree	Strongly Agree	Strongly Agree	Disagree	Agree	Strongly Agree	Undecided	Strongly Agree	Disagree	Undecided	Undecided	Strongly Disagree	Disagree	Strongly Disagree	Undecided	Agree	Strongly Disagree	Disagree	Agree	Disagree	Strongly Disagree	Disagree
35	25-40 years		Female	Christian	Married	Tertiary	Public servant	Ewe	Two	4+ visits	Urban	Yes	0	Strongly Agree	Strongly Agree	Strongly Agree	Strongly Agree	Disagree	Strongly Agree	Agree	Agree	Agree	Strongly Agree	Strongly Agree	Disagree	Agree	Disagree	Agree	Agree	Agree	Agree	Agree	Agree	Strongly Agree	Strongly Agree	Strongly Disagree	Strongly Disagree	Disagree	Strongly Agree	Strongly Agree	Strongly Agree	Strongly Agree	Strongly Agree	Disagree	Strongly Agree	Disagree	Strongly Disagree	Undecided	Agree
34	41-46 years		Female	Christian	Married	Basic	Self/Private employed	Akan	More than two	<4 visits	Rural	No	0	Agree	Undecided	Undecided	Undecided	Undecided	Agree	Undecided	Undecided	Undecided	Agree	Disagree	Disagree	Strongly Disagree	Strongly Disagree	Strongly Disagree	Strongly Disagree	Agree	Agree	Agree	Agree	Undecided	Undecided	Strongly Disagree	Agree	Strongly Disagree	Agree	Agree	Undecided	Agree	Agree	Agree	Undecided	Agree	Strongly Disagree	Strongly Disagree	Undecided
32	18-24 years		Female	Traditional	Single	Basic	Self/Private employed	Ga	None	<4 visits	Rural	No	0	Undecided	Undecided	Undecided	Undecided	Undecided	Undecided	Undecided	Undecided	Undecided	Undecided	Undecided	Undecided	Undecided	Undecided	Undecided	Undecided	Undecided	Undecided	Undecided	Undecided	Undecided	Undecided	Undecided	Undecided	Undecided	Undecided	Undecided	Undecided	Undecided	Undecided	Undecided	Undecided	Undecided	Undecided	Undecided	Undecided
33	25-40 years		Male	Christian	Married	Secondary	Self/Private employed	Akan	Two	<4 visits	Rural	Yes	0	Strongly Agree	Agree	Agree	Undecided	Strongly Agree	Agree	Strongly Agree	Agree	Agree	Strongly Agree	Agree	Strongly Agree	Agree	Agree	Strongly Agree	Strongly Agree	Agree	Strongly Agree	Strongly Agree	Agree	Strongly Agree	Agree	Strongly Agree	Agree	Strongly Agree	Agree	Strongly Agree	Strongly Agree	Agree	Agree	Strongly Agree	Agree	Agree	Strongly Agree	Agree	Strongly Agree
30	25-40 years		Female	Muslim	Married	Tertiary	Public servant	Akan	One	4+ visits	Estate	Yes	0	Strongly Agree	Agree	Agree	Undecided	Disagree	Undecided	Agree	Agree	Undecided	Disagree	Disagree	Agree	Agree	Disagree	Agree	Agree	Strongly Agree	Strongly Agree	Agree	Agree	Strongly Agree	Strongly Agree	Strongly Disagree	Undecided	Undecided	Agree	Undecided	Strongly Disagree	Agree	Agree	Undecided	Disagree	Strongly Disagree	Strongly Disagree	Disagree	Agree
31	41-46 years		Female	Christian	Married	Tertiary	Public servant	Ewe	Two	4+ visits	Urban	Yes	0	Strongly Agree	Strongly Agree	Strongly Agree	Strongly Agree	Agree	Agree	Agree	Agree	Agree	Disagree	Strongly Agree	Strongly Agree	Agree	Disagree	Agree	Agree	Agree	Agree	Agree	Agree	Agree	Strongly Agree	Strongly Disagree	Strongly Disagree	Agree	Strongly Agree	Agree	Agree	Strongly Agree	Strongly Agree	Agree	Agree	Strongly Disagree	Strongly Disagree	Disagree	Agree
29	25-40 years		Female	Christian	Married	Tertiary	Public servant	Ewe	Two	4+ visits	Estate	Yes	0	Strongly Agree	Agree	Agree	Agree	Agree	Strongly Agree	Agree	Agree	Agree	Strongly Agree	Undecided	Agree	Agree	Undecided	Undecided	Undecided	Agree	Strongly Agree	Strongly Agree	Strongly Agree	Agree	Agree	Strongly Disagree	Undecided	Undecided	Agree	Agree	Undecided	Agree	Agree	Undecided	Disagree	Strongly Disagree	Strongly Disagree	Strongly Disagree	Agree
28	41-46 years		Female	Christian	Married	Tertiary	Public servant	Ewe	Two	4+ visits	Urban	Yes	0	Strongly Agree	Agree	Agree	Agree	Agree	Strongly Agree	Agree	Agree	Agree	Strongly Agree	Agree	Agree	Strongly Agree	Undecided	Undecided	Undecided	Agree	Agree	Strongly Agree	Strongly Agree	Agree	Agree	Strongly Disagree	Undecided	Strongly Disagree	Agree	Agree	Agree	Strongly Agree	Strongly Agree	Agree	Strongly Agree	Strongly Disagree	Strongly Disagree	Strongly Disagree	Agree
26	18-24 years		Female	Christian	Single	Tertiary	Unknown	Akan	None	4+ visits	Urban	Yes	0	Strongly Agree	Undecided	Strongly Agree	Strongly Agree	Disagree	Disagree	Disagree	Disagree	Disagree	Undecided	Disagree	Disagree	Disagree	Disagree	Disagree	Undecided	Strongly Agree	Strongly Agree	Strongly Agree	Disagree	Agree	Agree	Disagree	Agree	Agree	Disagree	Disagree	Disagree	Disagree	Agree	Agree	Disagree	Disagree	Disagree	Agree	Disagree
27	41-46 years		Female	Muslim	Married	Secondary	Self/Private employed	Akan	More than two	4+ visits	Urban	No	1	Agree	Agree	Agree	Agree	Disagree	Agree	Agree	Agree	Agree	Agree	Undecided	Agree	Agree	Undecided	Undecided	Undecided	Strongly Agree	Strongly Agree	Strongly Agree	Strongly Agree	Agree	Agree	Strongly Disagree	Agree	Undecided	Agree	Agree	Agree	Agree	Agree	Undecided	Agree	Disagree	Disagree	Disagree	Disagree
25	25-40 years		Female	Muslim	Divorced/Separated	Tertiary	Unknown	Ga	One	4+ visits	Rural	Yes	1	Strongly Agree	Undecided	Agree	Agree	Disagree	Disagree	Disagree	Disagree	Disagree	Agree	Disagree	Disagree	Disagree	Disagree	Disagree	Undecided	Strongly Agree	Strongly Agree	Strongly Agree	Disagree	Agree	Agree	Disagree	Agree	Agree	Strongly Agree	Disagree	Disagree	Disagree	Agree	Agree	Disagree	Disagree	Disagree	Agree	Disagree
23	25-40 years		Female	Traditional	Single	Secondary	Unknown	Akan	Two	4+ visits	Rural	Yes	0	Strongly Agree	Undecided	Strongly Agree	Strongly Agree	Disagree	Disagree	Disagree	Disagree	Disagree	Undecided	Disagree	Disagree	Disagree	Disagree	Disagree	Undecided	Strongly Agree	Strongly Agree	Strongly Agree	Disagree	Agree	Agree	Disagree	Agree	Agree	Strongly Agree	Disagree	Disagree	Disagree	Agree	Agree	Disagree	Disagree	Disagree	Agree	Disagree
24	18-24 years		Female	Traditional	Single	Basic	Unknown	Ga	One	4+ visits	Rural	Yes	1	Strongly Agree	Undecided	Strongly Agree	Strongly Agree	Disagree	Disagree	Disagree	Disagree	Disagree	Undecided	Disagree	Disagree	Disagree	Disagree	Disagree	Undecided	Strongly Agree	Strongly Agree	Strongly Agree	Disagree	Agree	Agree	Disagree	Agree	Agree	Strongly Agree	Disagree	Disagree	Disagree	Agree	Agree	Disagree	Disagree	Disagree	Agree	Agree
22	18-24 years		Female	Christian	Married	Tertiary	Public servant	Ga	None	4+ visits	Estate	Yes	0	Agree	Agree	Agree	Disagree	Strongly Disagree	Agree	Undecided	Agree	Agree	Agree	Agree	Disagree	Agree	Undecided	Undecided	Disagree	Strongly Agree	Undecided	Disagree	Strongly Agree	Strongly Agree	Disagree	Disagree	Undecided	Disagree	Agree	Agree	Agree	Strongly Agree	Agree	Undecided	Agree	Strongly Agree	Disagree	Disagree	Agree
21	25-40 years		Male	Christian	Married	Tertiary	Student/Unemployed	Ga	None	<4 visits	Urban	Yes	0	Agree	Strongly Agree	Strongly Agree	Disagree	Strongly Disagree	Agree	Undecided	Agree	Agree	Agree	Agree	Disagree	Agree	Undecided	Undecided	Disagree	Strongly Agree	Undecided	Disagree	Strongly Agree	Strongly Agree	Disagree	Disagree	Undecided	Disagree	Agree	Agree	Agree	Strongly Agree	Agree	Undecided	Agree	Strongly Agree	Disagree	Disagree	Agree
19	25-40 years		Male	Christian	Married	Tertiary	Self/Private employed	Akan	One	<4 visits	Estate	Yes	1	Strongly Agree	Undecided	Agree	Strongly Agree	Strongly Agree	Strongly Agree	Strongly Disagree	Strongly Disagree	Strongly Agree	Strongly Agree	Strongly Disagree	Disagree	Agree	Undecided	Undecided	Strongly Agree	Strongly Agree	Strongly Agree	Agree	Strongly Disagree	Agree	Agree	Strongly Disagree	Strongly Disagree	Strongly Agree	Strongly Agree	Strongly Agree	Strongly Disagree	Undecided	Agree	Strongly Disagree	Strongly Agree	Strongly Agree	Strongly Disagree	Agree	Strongly Agree
20	25-40 years		Female	Christian	Married	Tertiary	Student/Unemployed	Akan	One	4+ visits	Urban	Yes	0	Strongly Agree	Undecided	Strongly Agree	Strongly Agree	Strongly Disagree	Strongly Disagree	Strongly Agree	Strongly Disagree	Strongly Agree	Strongly Agree	Strongly Disagree	Disagree	Agree	Undecided	Undecided	Strongly Agree	Strongly Agree	Strongly Agree	Agree	Strongly Disagree	Strongly Agree	Agree	Strongly Disagree	Strongly Disagree	Strongly Agree	Strongly Agree	Strongly Agree	Strongly Disagree	Undecided	Agree	Strongly Disagree	Strongly Agree	Strongly Agree	Strongly Disagree	Agree	Strongly Agree
18	18-24 years		Male	Muslim	Single	Secondary	Unknown	Ga	One	<4 visits	Urban	No	0	Strongly Agree	Strongly Agree	Disagree	Strongly Agree	Agree	Agree	Agree	Strongly Agree	Agree	Disagree	Disagree	Strongly Disagree	Strongly Disagree	Strongly Disagree	Agree	Agree	Agree	Agree	Agree	Agree	Strongly Agree	Disagree	Strongly Disagree	Strongly Disagree	Agree	Agree	Strongly Disagree	Disagree	Strongly Agree	Strongly Agree	Undecided	Disagree	Agree	Strongly Disagree	Agree	Agree
17	25-40 years		Male	Christian	Single	Tertiary	Self/Private employed	Akan	None	<4 visits	Urban	No	0	Strongly Disagree	Strongly Disagree	Disagree	Strongly Agree	Agree	Strongly Disagree	Disagree	Agree	Agree	Disagree	Disagree	Agree	Agree	Agree	Agree	Strongly Agree	Strongly Agree	Strongly Agree	Strongly Agree	Agree	Strongly Agree	Disagree	Strongly Disagree	Agree	Strongly Agree	Strongly Agree	Strongly Agree	Strongly Disagree	Strongly Agree	Strongly Agree	Strongly Disagree	Disagree	Strongly Agree	Strongly Disagree	Disagree	Agree
15	18-24 years		Female	Christian	Single	Secondary	Student/Unemployed	Ewe	None	<4 visits	Urban	No	0	Strongly Agree	Strongly Disagree	Disagree	Agree	Disagree	Disagree	Disagree	Disagree	Disagree	Undecided	Undecided	Undecided	Undecided	Agree	Disagree	Undecided	Strongly Agree	Undecided	Undecided	Undecided	Agree	Agree	Disagree	Disagree	Strongly Agree	Undecided	Agree	Undecided	Agree	Agree	Undecided	Agree	Undecided	Strongly Disagree	Disagree	Agree
16	18-24 years		Female	Christian	Single	Tertiary	Self/Private employed	Akan	One	<4 visits	Urban	Yes	0	Agree	Disagree	Agree	Agree	Strongly Disagree	Strongly Disagree	Agree	Agree	Agree	Agree	Agree	Agree	Agree	Agree	Agree	Agree	Agree	Agree	Disagree	Disagree	Strongly Agree	Strongly Agree	Agree	Agree	Agree	Agree	Agree	Agree	Agree	Agree	Agree	Agree	Agree	Disagree	Agree	Agree
12	18-24 years		Male	Christian	Single	Tertiary	Student/Unemployed	Ewe	None	<4 visits	Urban	No	0	Agree	Agree	Disagree	Disagree	Disagree	Disagree	Strongly Agree	Agree	Agree	Strongly Agree	Agree	Strongly Agree	Strongly Agree	Strongly Agree	Agree	Strongly Agree	Strongly Agree	Strongly Agree	Agree	Agree	Agree	Agree	Disagree	Strongly Agree	Strongly Agree	Agree	Agree	Agree	Undecided	Agree	Agree	Disagree	Agree	Strongly Disagree	Disagree	Agree
13	18-24 years		Male	Christian	Single	Tertiary	Student/Unemployed	Ewe	None	<4 visits	Urban	No	0	Agree	Agree	Disagree	Disagree	Disagree	Disagree	Strongly Agree	Agree	Agree	Strongly Agree	Agree	Strongly Agree	Strongly Agree	Strongly Agree	Agree	Strongly Agree	Strongly Agree	Strongly Agree	Agree	Agree	Agree	Agree	Disagree	Strongly Agree	Strongly Agree	Agree	Agree	Agree	Undecided	Agree	Agree	Disagree	Agree	Strongly Disagree	Disagree	Agree
14	18-24 years		Male	Christian	Single	Tertiary	Public servant	Ewe	None	<4 visits	Urban	No	0	Strongly Agree	Strongly Disagree	Disagree	Agree	Agree	Disagree	Disagree	Disagree	Undecided	Undecided	Undecided	Undecided	Undecided	Agree	Disagree	Undecided	Strongly Agree	Agree	Undecided	Undecided	Strongly Agree	Agree	Undecided	Undecided	Agree	Agree	Agree	Undecided	Agree	Agree	Undecided	Agree	Undecided	Undecided	Agree	Agree
11	18-24 years		Female	Christian	Single	Tertiary	Public servant	Ewe	None	4+ visits	Urban	Yes	1	Strongly Agree	Strongly Disagree	Strongly Disagree	Strongly Disagree	Strongly Disagree	Strongly Disagree	Undecided	Agree	Agree	Strongly Disagree	Agree	Disagree	Agree	Disagree	Strongly Disagree	Disagree	Strongly Agree	Disagree	Strongly Disagree	Strongly Disagree	Strongly Agree	Strongly Disagree	Strongly Disagree	Strongly Disagree	Strongly Agree	Strongly Agree	Strongly Agree	Strongly Disagree	Strongly Agree	Strongly Agree	Disagree	Strongly Agree	Strongly Agree	Strongly Disagree	Strongly Disagree	Disagree
10	18-24 years		Female	Christian	Single	Tertiary	Public servant	Ewe	None	<4 visits	Urban	No	0	Strongly Agree	Strongly Disagree	Strongly Disagree	Strongly Disagree	Strongly Disagree	Strongly Disagree	Strongly Disagree	Strongly Disagree	Agree	Strongly Disagree	Strongly Disagree	Undecided	Agree	Strongly Disagree	Strongly Disagree	Strongly Disagree	Agree	Disagree	Strongly Disagree	Strongly Disagree	Strongly Agree	Strongly Disagree	Strongly Disagree	Disagree	Strongly Agree	Strongly Agree	Strongly Agree	Strongly Disagree	Strongly Agree	Strongly Agree	Disagree	Undecided	Strongly Agree	Strongly Disagree	Strongly Disagree	Strongly Disagree
8	18-24 years		Female	Christian	Single	Secondary	Student/Unemployed	Ewe	One	4+ visits	Rural	No	0	Disagree	Strongly Disagree	Strongly Disagree	Disagree	Disagree	Disagree	Strongly Disagree	Disagree	Undecided	Strongly Disagree	Undecided	Agree	Agree	Strongly Disagree	Undecided	Undecided	Undecided	Undecided	Undecided	Undecided	Undecided	Disagree	Undecided	Agree	Strongly Disagree	Strongly Disagree	Strongly Disagree	Undecided	Strongly Disagree	Disagree	Disagree	Undecided	Undecided	Agree	Undecided	Undecided
9	18-24 years		Female	Christian	Married	Secondary	Self/Private employed	Ewe	More than two	<4 visits	Rural	No	0	Disagree	Undecided	Disagree	Disagree	Undecided	Disagree	Undecided	Undecided	Agree	Agree	Disagree	Disagree	Disagree	Disagree	Disagree	Disagree	Disagree	Agree	Agree	Disagree	Agree	Undecided	Strongly Agree	Strongly Agree	Strongly Agree	Strongly Agree	Undecided	Agree	Agree	Agree	Strongly Agree	Undecided	Disagree	Agree	Strongly Agree	Undecided
7	41-46 years		Female	Christian	Married	Tertiary	Public servant	Ewe	More than two	4+ visits	Rural	No	1	Strongly Disagree	Strongly Disagree	Strongly Disagree	Strongly Disagree	Strongly Agree	Strongly Agree	Strongly Disagree	Strongly Disagree	Strongly Disagree	Strongly Disagree	Strongly Disagree	Agree	Strongly Disagree	Strongly Disagree	Agree	Agree	Strongly Disagree	Strongly Disagree	Agree	Strongly Disagree	Strongly Disagree	Undecided	Agree	Agree	Disagree	Disagree	Disagree	Strongly Disagree	Strongly Disagree	Strongly Disagree	Agree	Strongly Disagree	Strongly Disagree	Agree	Disagree	Disagree
4	25-40 years		Female	Christian	Single	Secondary	Self/Private employed	Ewe	One	<4 visits	Rural	No	0	Strongly Disagree	Disagree	Strongly Disagree	Strongly Disagree	Strongly Agree	Agree	Disagree	Strongly Disagree	Strongly Disagree	Undecided	Agree	Disagree	Disagree	Disagree	Strongly Disagree	Undecided	Disagree	Disagree	Undecided	Strongly Disagree	Strongly Disagree	Strongly Disagree	Strongly Agree	Disagree	Strongly Disagree	Strongly Disagree	Strongly Disagree	Strongly Disagree	Disagree	Disagree	Undecided	Undecided	Strongly Disagree	Agree	Undecided	Disagree
5	41-46 years		Female	Muslim	Divorced/Separated	Secondary	Self/Private employed	Ga	Two	4+ visits	Rural	No	0	Disagree	Strongly Disagree	Undecided	Agree	Disagree	Undecided	Disagree	Undecided	Disagree	Undecided	Agree	Disagree	Disagree	Undecided	Disagree	Disagree	Undecided	Undecided	Disagree	Disagree	Disagree	Agree	Agree	Strongly Agree	Undecided	Agree	Undecided	Disagree	Strongly Disagree	Strongly Disagree	Undecided	Undecided	Undecided	Disagree	Undecided	Disagree
6	25-40 years		Female	Christian	Married	Tertiary	Public servant	Akan	Two	4+ visits	Urban	Yes	0	Strongly Disagree	Disagree	Strongly Disagree	Strongly Disagree	Strongly Agree	Strongly Agree	Disagree	Disagree	Strongly Disagree	Strongly Disagree	Strongly Disagree	Agree	Disagree	Strongly Disagree	Strongly Disagree	Agree	Strongly Disagree	Strongly Disagree	Strongly Agree	Strongly Disagree	Strongly Disagree	Strongly Disagree	Agree	Undecided	Strongly Disagree	Strongly Disagree	Strongly Disagree	Strongly Disagree	Strongly Disagree	Strongly Disagree	Agree	Strongly Disagree	Undecided	Agree	Undecided	Disagree
2	41-46 years		Female	Christian	Single	Secondary	Student/Unemployed	Akan	None	<4 visits	Rural	Yes	0	Agree	Undecided	Agree	Undecided	Disagree	Disagree	Agree	Undecided	Agree	Disagree	Agree	Disagree	Agree	Agree	Strongly Agree	Agree	Strongly Agree	Agree	Undecided	Undecided	Agree	Agree	Strongly Disagree	Agree	Agree	Strongly Agree	Strongly Agree	Agree	Agree	Agree	Undecided	Undecided	Agree	Undecided	Disagree	Agree
3	25-40 years		Female	Christian	Married	Tertiary	Student/Unemployed	Akan	One	4+ visits	Rural	Yes	1	Agree	Undecided	Strongly Agree	Strongly Agree	Disagree	Undecided	Agree	Agree	Agree	Agree	Strongly Agree	Disagree	Undecided	Agree	Agree	Undecided	Agree	Agree	Undecided	Undecided	Agree	Agree	Undecided	Disagree	Agree	Agree	Strongly Agree	Agree	Agree	Agree	Disagree	Agree	Agree	Disagree	Strongly Agree	Strongly Agree
1	18-24 years		Female	Christian	Single	Secondary	Public servant	Ewe	One	<4 visits	Rural	No	0	Agree	Undecided	Undecided	Strongly Disagree	Strongly Disagree	Agree	Undecided	Undecided	Undecided	Strongly Disagree	Undecided	Undecided	Undecided	Agree	Agree	Undecided	Agree	Agree	Agree	Agree	Agree	Undecided	Undecided	Undecided	Agree	Agree	Agree	Undecided	Agree	Agree	Agree	Undecided	Agree	Agree	Undecided	Agree
97	25-40 years		Female	Christian	Single	Secondary	Unknown	Ewe	None	<4 visits	Urban	Yes	0	Strongly Agree	Undecided	Agree	Agree	Strongly Disagree	Strongly Disagree	Agree	Agree	Agree	Strongly Agree	Agree	Undecided	Agree	Agree	Undecided	Agree	Strongly Agree	Strongly Agree	Strongly Agree	Undecided	Undecided	Undecided	Agree	Agree	Agree	Strongly Agree	Strongly Agree	Undecided	Strongly Agree	Strongly Agree	Strongly Agree	Strongly Agree	Strongly Disagree	Strongly Disagree	Undecided	Agree
174	18-24 years		Female	Christian	Single	Secondary	Unknown	Ewe	Two	4+ visits	Urban	No	0	Strongly Agree	Undecided	Undecided	Agree	Strongly Disagree	Strongly Disagree	Undecided	Undecided	Agree	Strongly Agree	Agree	Agree	Undecided	Agree	Agree	Agree	Agree	Agree	Agree	Agree	Undecided	Undecided	Agree	Agree	Undecided	Agree	Undecided	Undecided	Agree	Agree	Agree	Undecided	Disagree	Disagree	Undecided	Undecided
147	25-40 years		Female	Christian	Married	Tertiary	Public servant	Ewe	Two	4+ visits	Urban	Yes	0	Strongly Agree	Strongly Agree	Strongly Agree	Strongly Agree	Strongly Disagree	Strongly Disagree	Strongly Agree	Agree	Disagree	Agree	Strongly Disagree	Strongly Disagree	Strongly Disagree	Disagree	Disagree	Strongly Disagree	Strongly Agree	Strongly Disagree	Strongly Disagree	Strongly Disagree	Strongly Agree	Strongly Agree	Strongly Disagree	Strongly Disagree	Strongly Agree	Undecided	Agree	Strongly Disagree	Agree	Strongly Agree	Strongly Disagree	Agree	Agree	Strongly Disagree	Strongly Disagree	Strongly Agree
143	25-40 years		Female	Christian	Married	Tertiary	Public servant	Ewe	One	4+ visits	Urban	No	0	Agree	Undecided	Agree	Undecided	Undecided	Disagree	Agree	Agree	Agree	Agree	Agree	Agree	Agree	Agree	Undecided	Agree	Agree	Agree	Undecided	Undecided	Undecided	Undecided	Undecided	Disagree	Agree	Agree	Agree	Undecided	Disagree	Undecided	Undecided	Disagree	Disagree	Undecided	Agree	Agree
118	25-40 years		Female	Christian	Married	Basic	Self/Private employed	Ewe	Two	4+ visits	Urban	No	0	Strongly Agree	Disagree	Disagree	Disagree	Disagree	Disagree	Agree	Agree	Agree	Agree	Disagree	Disagree	Disagree	Disagree	Disagree	Disagree	Strongly Agree	Strongly Agree	Disagree	Disagree	Undecided	Disagree	Disagree	Disagree	Disagree	Agree	Disagree	Disagree	Disagree	Strongly Agree	Strongly Agree	Disagree	Agree	Disagree	Agree	Disagree
108	41-46 years		Female	Christian	Married	Tertiary	Public servant	Others	Two	4+ visits	Urban	Yes	0	Strongly Agree	Strongly Agree	Undecided	Agree	Strongly Disagree	Strongly Disagree	Disagree	Undecided	Agree	Strongly Agree	Agree	Undecided	Disagree	Undecided	Undecided	Agree	Strongly Agree	Strongly Agree	Undecided	Undecided	Agree	Undecided	Agree	Agree	Agree	Strongly Agree	Agree	Disagree	Agree	Agree	Agree	Agree	Undecided	Disagree	Agree	Agree
63	25-40 years		Female	Christian	Married	Secondary	Unknown	Akan	One	4+ visits	Urban	Yes	0	Strongly Agree	Agree	Agree	Undecided	Strongly Disagree	Strongly Disagree	Agree	Undecided	Undecided	Agree	Undecided	Undecided	Agree	Strongly Disagree	Agree	Strongly Disagree	Strongly Agree	Strongly Agree	Undecided	Undecided	Strongly Agree	Undecided	Strongly Disagree	Agree	Agree	Strongly Agree	Strongly Agree	Undecided	Strongly Agree	Strongly Agree	Agree	Strongly Agree	Undecided	Undecided	Undecided	Agree
64	18-24 years		Female	Christian	Single	Tertiary	Unknown	Akan	One	<4 visits	Urban	No	0	Agree	Undecided	Undecided	Agree	Undecided	Undecided	Undecided	Undecided	Undecided	Agree	Agree	Undecided	Undecided	Undecided	Undecided	Undecided	Strongly Agree	Strongly Agree	Agree	Undecided	Undecided	Undecided	Disagree	Disagree	Strongly Agree	Undecided	Undecided	Undecided	Agree	Agree	Undecided	Agree	Undecided	Strongly Disagree	Agree	Undecided
65	25-40 years		Female	Christian	Married	Tertiary	Self/Private employed	Others	More than two	4+ visits	Urban	No	1	Strongly Agree	Strongly Disagree	Undecided	Strongly Agree	Strongly Disagree	Undecided	Strongly Agree	Strongly Agree	Strongly Agree	Strongly Agree	Strongly Agree	Strongly Agree	Strongly Agree	Undecided	Strongly Agree	Undecided	Strongly Agree	Strongly Agree	Strongly Agree	Undecided	Strongly Agree	Strongly Agree	Strongly Agree	Strongly Agree	Strongly Agree	Strongly Agree	Strongly Agree	Undecided	Strongly Agree	Strongly Agree	Strongly Agree	Strongly Agree	Strongly Agree	Strongly Disagree	Strongly Agree	Strongly Agree
66	>46 years	49	Female	Christian	Married	Basic	Self/Private employed	Ewe	More than two	4+ visits	Urban	Yes	0	Strongly Agree	Strongly Agree	Strongly Agree	Undecided	Strongly Disagree	Strongly Disagree	Strongly Agree	Strongly Disagree	Strongly Agree	Strongly Agree	Strongly Agree	Strongly Disagree	Agree	Strongly Agree	Strongly Disagree	Strongly Disagree	Strongly Agree	Strongly Agree	Strongly Agree	Strongly Disagree	Strongly Agree	Undecided	Strongly Disagree	Strongly Disagree	Agree	Agree	Undecided	Undecided	Strongly Agree	Strongly Agree	Agree	Undecided	Strongly Agree	Strongly Disagree	Agree	Strongly Agree
67	>46 years	60	Female	Christian	Married	None	Self/Private employed	Ewe	More than two	4+ visits	Rural	Yes	0	Strongly Agree	Strongly Agree	Strongly Agree	Disagree	Agree	Disagree	Strongly Agree	Strongly Disagree	Strongly Agree	Strongly Agree	Strongly Agree	Strongly Agree	Strongly Agree	Strongly Agree	Strongly Disagree	Agree	Strongly Agree	Strongly Agree	Strongly Agree	Strongly Agree	Strongly Agree	Undecided	Strongly Disagree	Undecided	Strongly Agree	Disagree	Strongly Agree	Strongly Agree	Strongly Agree	Strongly Agree	Strongly Agree	Strongly Agree	Strongly Agree	Undecided	Strongly Agree	Strongly Agree
68	18-24 years		Male	Christian	Single	Tertiary	Unknown	Ewe	None	<4 visits	Urban	Yes	0	Strongly Agree	Strongly Agree	Strongly Agree	Agree	Strongly Disagree	Strongly Disagree	Undecided	Strongly Disagree	Agree	Agree	Strongly Agree	Strongly Disagree	Disagree	Agree	Disagree	Agree	Strongly Agree	Strongly Agree	Strongly Agree	Strongly Agree	Strongly Agree	Disagree	Strongly Disagree	Undecided	Strongly Agree	Strongly Agree	Strongly Agree	Strongly Agree	Strongly Agree	Strongly Agree	Undecided	Agree	Strongly Agree	Strongly Disagree	Undecided	Undecided
69	41-46 years		Female	Muslim	Married	Basic	Unknown	Others	More than two	4+ visits	Rural	Yes	0	Agree	Agree	Agree	Undecided	Disagree	Undecided	Undecided	Undecided	Undecided	Agree	Agree	Disagree	Disagree	Undecided	Disagree	Disagree	Agree	Agree	Undecided	Undecided	Agree	Agree	Disagree	Undecided	Agree	Agree	Agree	Undecided	Agree	Agree	Undecided	Agree	Agree	Undecided	Undecided	Disagree
70	25-40 years		Female	Muslim	Married	Secondary	Self/Private employed	Others	More than two	4+ visits	Rural	Yes	0	Agree	Undecided	Agree	Undecided	Undecided	Undecided	Undecided	Disagree	Undecided	Agree	Agree	Undecided	Undecided	Agree	Undecided	Undecided	Strongly Agree	Strongly Agree	Agree	Undecided	Agree	Agree	Strongly Disagree	Agree	Agree	Agree	Agree	Undecided	Agree	Agree	Agree	Agree	Agree	Strongly Disagree	Disagree	Agree
71	25-40 years		Female	Christian	Married	Tertiary	Public servant	Others	Two	4+ visits	Rural	No	0	Agree	Undecided	Agree	Undecided	Strongly Disagree	Undecided	Agree	Agree	Agree	Strongly Agree	Strongly Agree	Undecided	Undecided	Undecided	Strongly Disagree	Undecided	Strongly Agree	Strongly Agree	Agree	Undecided	Strongly Agree	Strongly Agree	Strongly Disagree	Strongly Disagree	Strongly Agree	Undecided	Agree	Undecided	Strongly Agree	Strongly Agree	Undecided	Strongly Agree	Strongly Agree	Strongly Disagree	Strongly Agree	Agree
72	18-24 years		Female	Christian	Single	Tertiary	Public servant	Akan	None	<4 visits	Urban	Yes	0	Strongly Agree	Strongly Agree	Strongly Agree	Strongly Agree	Strongly Agree	Strongly Disagree	Strongly Agree	Strongly Agree	Strongly Agree	Agree	Strongly Agree	Undecided	Strongly Agree	Strongly Agree	Strongly Agree	Agree	Strongly Agree	Strongly Agree	Strongly Agree	Strongly Agree	Strongly Agree	Strongly Agree	Strongly Disagree	Agree	Agree	Agree	Agree	Strongly Agree	Undecided	Strongly Agree	Strongly Disagree	Strongly Agree	Strongly Agree	Strongly Disagree	Strongly Disagree	Strongly Agree
73	25-40 years		Female	Christian	Married	Tertiary	Public servant	Ewe	Two	4+ visits	Urban	Yes	0	Strongly Agree	Strongly Agree	Strongly Agree	Agree	Undecided	Strongly Disagree	Agree	Disagree	Agree	Agree	Undecided	Disagree	Strongly Disagree	Undecided	Strongly Disagree	Strongly Disagree	Strongly Agree	Strongly Agree	Agree	Undecided	Strongly Agree	Agree	Strongly Disagree	Disagree	Agree	Strongly Agree	Agree	Agree	Agree	Strongly Agree	Undecided	Agree	Strongly Agree	Strongly Disagree	Strongly Disagree	Agree
74	25-40 years		Female	Christian	Married	None	Self/Private employed	Ewe	More than two	4+ visits	Rural	Yes	0	Strongly Agree	Undecided	Strongly Agree	Strongly Agree	Strongly Agree	Disagree	Disagree	Agree	Disagree	Strongly Agree	Strongly Agree	Disagree	Undecided	Strongly Disagree	Strongly Disagree	Strongly Disagree	Strongly Agree	Strongly Agree	Strongly Agree	Strongly Agree	Strongly Agree	Undecided	Disagree	Disagree	Strongly Agree	Strongly Agree	Agree	Strongly Disagree	Strongly Agree	Strongly Agree	Disagree	Strongly Agree	Strongly Agree	Strongly Disagree	Agree	Strongly Agree
75	25-40 years		Female	Christian	Single	Tertiary	Public servant	Ewe	One	4+ visits	Urban	No	0	Strongly Agree	Undecided	Undecided	Disagree	Disagree	Undecided	Undecided	Undecided	Strongly Disagree	Strongly Agree	Undecided	Undecided	Undecided	Strongly Disagree	Undecided	Undecided	Strongly Agree	Strongly Agree	Undecided	Undecided	Undecided	Undecided	Undecided	Strongly Disagree	Strongly Agree	Agree	Undecided	Undecided	Strongly Agree	Strongly Agree	Undecided	Undecided	Strongly Agree	Undecided	Strongly Disagree	Strongly Disagree
76	41-46 years		Female	Christian	Married	Secondary	Self/Private employed	Ewe	One	4+ visits	Urban	No	0	Strongly Agree	Strongly Disagree	Undecided	Undecided	Undecided	Undecided	Undecided	Agree	Agree	Strongly Agree	Agree	Undecided	Agree	Disagree	Disagree	Undecided	Strongly Agree	Strongly Agree	Strongly Agree	Undecided	Undecided	Undecided	Agree	Agree	Agree	Agree	Undecided	Undecided	Agree	Strongly Agree	Agree	Undecided	Disagree	Undecided	Strongly Agree	Agree
77	18-24 years		Female	Christian	Single	Basic	Self/Private employed	Ewe	One	<4 visits	Urban	No	0	Strongly Agree	Undecided	Undecided	Agree	Undecided	Undecided	Undecided	Undecided	Undecided	Strongly Agree	Agree	Undecided	Undecided	Agree	Undecided	Undecided	Strongly Agree	Strongly Agree	Undecided	Undecided	Undecided	Undecided	Agree	Agree	Agree	Strongly Agree	Undecided	Undecided	Agree	Strongly Agree	Agree	Undecided	Strongly Disagree	Strongly Disagree	Strongly Agree	Agree
78	41-46 years		Female	Muslim	Married	Tertiary	Public servant	Akan	More than two	4+ visits	Urban	No	1	Strongly Agree	Undecided	Agree	Agree	Disagree	Undecided	Undecided	Undecided	Agree	Strongly Agree	Agree	Undecided	Agree	Agree	Disagree	Agree	Strongly Agree	Strongly Agree	Agree	Undecided	Undecided	Undecided	Strongly Disagree	Undecided	Agree	Strongly Agree	Agree	Disagree	Agree	Undecided	Undecided	Strongly Disagree	Strongly Disagree	Strongly Disagree	Disagree	Disagree
79	25-40 years		Female	Christian	Married	Tertiary	Unknown	Ewe	Two	4+ visits	Urban	No	0	Strongly Agree	Undecided	Agree	Strongly Agree	Strongly Disagree	Strongly Disagree	Undecided	Agree	Agree	Strongly Agree	Agree	Undecided	Undecided	Undecided	Undecided	Undecided	Strongly Agree	Strongly Agree	Undecided	Disagree	Undecided	Undecided	Agree	Agree	Agree	Agree	Agree	Undecided	Agree	Agree	Agree	Undecided	Strongly Disagree	Strongly Disagree	Agree	Agree
80	25-40 years		Female	Christian	Single	Tertiary	Student/Unemployed	Ewe	None	<4 visits	Urban	Yes	0	Agree	Agree	Agree	Agree	Disagree	Disagree	Strongly Agree	Agree	Agree	Agree	Agree	Disagree	Agree	Disagree	Disagree	Disagree	Agree	Agree	Agree	Disagree	Agree	Agree	Disagree	Disagree	Agree	Agree	Undecided	Agree	Agree	Agree	Disagree	Undecided	Disagree	Disagree	Disagree	Undecided
81	25-40 years		Female	Muslim	Married	Secondary	Self/Private employed	Akan	One	4+ visits	Urban	Yes	0	Agree	Agree	Agree	Undecided	Undecided	Agree	Undecided	Undecided	Undecided	Agree	Agree	Undecided	Undecided	Undecided	Undecided	Undecided	Agree	Agree	Agree	Agree	Undecided	Undecided	Disagree	Disagree	Disagree	Agree	Agree	Agree	Agree	Agree	Undecided	Agree	Undecided	Undecided	Disagree	Agree
82	25-40 years		Female	Christian	Married	Tertiary	Unknown	Ewe	One	4+ visits	Urban	Yes	0	Strongly Agree	Strongly Agree	Strongly Agree	Agree	Undecided	Agree	Agree	Agree	Undecided	Agree	Agree	Agree	Agree	Agree	Undecided	Agree	Agree	Agree	Agree	Agree	Agree	Agree	Disagree	Disagree	Agree	Agree	Agree	Agree	Agree	Agree	Agree	Undecided	Undecided	Agree	Agree	Undecided
83	25-40 years		Female	Christian	Single	Tertiary	Public servant	Ewe	None	<4 visits	Urban	Yes	0	Agree	Agree	Agree	Agree	Strongly Disagree	Strongly Disagree	Disagree	Strongly Disagree	Agree	Agree	Agree	Disagree	Agree	Disagree	Disagree	Disagree	Agree	Agree	Strongly Disagree	Disagree	Strongly Agree	Strongly Agree	Strongly Disagree	Strongly Disagree	Disagree	Disagree	Strongly Agree	Agree	Agree	Strongly Agree	Strongly Disagree	Strongly Agree	Agree	Strongly Disagree	Strongly Disagree	Disagree
84	18-24 years		Female	Christian	Single	Secondary	Student/Unemployed	Ewe	None	<4 visits	Urban	No	0	Agree	Undecided	Strongly Disagree	Strongly Disagree	Strongly Disagree	Undecided	Undecided	Strongly Disagree	Undecided	Strongly Disagree	Undecided	Agree	Strongly Disagree	Undecided	Undecided	Undecided	Agree	Agree	Undecided	Undecided	Strongly Disagree	Strongly Disagree	Strongly Disagree	Agree	Agree	Agree	Agree	Undecided	Agree	Strongly Agree	Undecided	Undecided	Strongly Disagree	Strongly Disagree	Agree	Agree
85	25-40 years		Female	Christian	Single	Tertiary	Public servant	Ewe	One	4+ visits	Urban	No	0	Strongly Agree	Undecided	Undecided	Undecided	Undecided	Strongly Disagree	Strongly Disagree	Disagree	Strongly Disagree	Undecided	Disagree	Undecided	Undecided	Undecided	Undecided	Undecided	Strongly Agree	Strongly Agree	Undecided	Undecided	Undecided	Undecided	Disagree	Undecided	Strongly Agree	Agree	Undecided	Undecided	Disagree	Undecided	Undecided	Strongly Agree	Disagree	Undecided	Disagree	Disagree
86	25-40 years		Female	Christian	Married	Tertiary	Public servant	Others	Two	4+ visits	Urban	No	0	Agree	Undecided	Undecided	Disagree	Strongly Disagree	Strongly Disagree	Agree	Undecided	Undecided	Agree	Undecided	Undecided	Undecided	Undecided	Disagree	Agree	Agree	Agree	Undecided	Undecided	Undecided	Strongly Disagree	Strongly Disagree	Undecided	Undecided	Undecided	Agree	Undecided	Agree	Agree	Undecided	Undecided	Undecided	Disagree	Disagree	Undecided
87	25-40 years		Female	Christian	Married	Basic	Self/Private employed	Ewe	Two	4+ visits	Rural	No	0	Strongly Agree	Strongly Disagree	Undecided	Strongly Agree	Undecided	Agree	Undecided	Agree	Strongly Agree	Strongly Agree	Undecided	Disagree	Disagree	Undecided	Strongly Disagree	Disagree	Strongly Agree	Strongly Agree	Strongly Agree	Strongly Agree	Strongly Disagree	Disagree	Strongly Disagree	Strongly Disagree	Disagree	Strongly Agree	Agree	Undecided	Strongly Agree	Strongly Agree	Strongly Agree	Agree	Agree	Strongly Disagree	Undecided	Undecided
88	25-40 years		Female	Christian	Single	Secondary	Self/Private employed	Ewe	None	<4 visits	Urban	No	0	Agree	Strongly Disagree	Strongly Disagree	Strongly Disagree	Strongly Disagree	Strongly Disagree	Agree	Agree	Undecided	Agree	Agree	Disagree	Agree	Agree	Undecided	Undecided	Agree	Agree	Agree	Agree	Undecided	Agree	Strongly Agree	Strongly Disagree	Strongly Disagree	Agree	Agree	Agree	Agree	Agree	Agree	Agree	Agree	Disagree	Disagree	Undecided
89	25-40 years		Female	Christian	Married	Tertiary	Public servant	Ewe	One	4+ visits	Urban	Yes	0	Strongly Agree	Agree	Undecided	Agree	Strongly Disagree	Undecided	Agree	Strongly Agree	Undecided	Strongly Agree	Agree	Undecided	Undecided	Agree	Agree	Strongly Agree	Agree	Agree	Agree	Agree	Undecided	Undecided	Strongly Disagree	Agree	Strongly Agree	Strongly Agree	Strongly Agree	Undecided	Strongly Agree	Strongly Agree	Agree	Undecided	Undecided	Disagree	Agree	Undecided
90	18-24 years		Female	Christian	Married	Tertiary	Unknown	Ewe	Two	4+ visits	Estate	Yes	0	Strongly Agree	Agree	Undecided	Undecided	Strongly Disagree	Strongly Disagree	Disagree	Disagree	Disagree	Agree	Agree	Strongly Disagree	Agree	Agree	Disagree	Disagree	Agree	Agree	Disagree	Disagree	Agree	Agree	Strongly Disagree	Strongly Disagree	Agree	Strongly Agree	Strongly Agree	Strongly Disagree	Undecided	Agree	Strongly Disagree	Strongly Agree	Agree	Strongly Disagree	Undecided	Agree
91	25-40 years		Female	Christian	Married	Tertiary	Unknown	Akan	More than two	4+ visits	Estate	No	0	Strongly Agree	Disagree	Disagree	Agree	Strongly Disagree	Agree	Agree	Strongly Agree	Strongly Agree	Agree	Agree	Disagree	Strongly Agree	Strongly Agree	Agree	Agree	Agree	Agree	Agree	Undecided	Undecided	Disagree	Disagree	Undecided	Undecided	Undecided	Undecided	Disagree	Strongly Agree	Strongly Agree	Agree	Disagree	Undecided	Disagree	Strongly Agree	Disagree
92	25-40 years		Female	Christian	Married	Basic	Self/Private employed	Ewe	One	4+ visits	Urban	No	0	Agree	Undecided	Agree	Agree	Disagree	Agree	Agree	Agree	Agree	Strongly Agree	Agree	Undecided	Agree	Undecided	Undecided	Undecided	Agree	Agree	Disagree	Disagree	Undecided	Undecided	Disagree	Disagree	Undecided	Agree	Undecided	Undecided	Agree	Agree	Undecided	Agree	Undecided	Disagree	Agree	Undecided
93	25-40 years		Female	Christian	Married	Tertiary	Public servant	Ewe	Two	4+ visits	Urban	No	0	Strongly Agree	Undecided	Disagree	Undecided	Strongly Disagree	Undecided	Undecided	Undecided	Undecided	Undecided	Undecided	Undecided	Undecided	Undecided	Undecided	Undecided	Agree	Agree	Undecided	Undecided	Undecided	Undecided	Strongly Disagree	Undecided	Strongly Agree	Strongly Agree	Undecided	Undecided	Undecided	Undecided	Undecided	Undecided	Agree	Strongly Disagree	Undecided	Undecided
94	25-40 years		Female	Christian	Married	Tertiary	Public servant	Ewe	Two	4+ visits	Urban	Yes	1	Strongly Agree	Undecided	Agree	Agree	Strongly Disagree	Strongly Disagree	Agree	Agree	Agree	Strongly Agree	Agree	Disagree	Strongly Agree	Strongly Agree	Undecided	Undecided	Strongly Agree	Agree	Strongly Agree	Agree	Strongly Agree	Undecided	Strongly Disagree	Agree	Agree	Agree	Strongly Agree	Undecided	Agree	Strongly Agree	Disagree	Strongly Agree	Strongly Agree	Strongly Disagree	Disagree	Agree
95	25-40 years		Female	Christian	Married	Basic	Self/Private employed	Ewe	Two	4+ visits	Urban	No	0	Strongly Agree	Undecided	Strongly Agree	Strongly Agree	Strongly Disagree	Agree	Undecided	Disagree	Undecided	Strongly Agree	Disagree	Undecided	Agree	Strongly Agree	Undecided	Undecided	Strongly Agree	Strongly Agree	Undecided	Undecided	Strongly Agree	Undecided	Strongly Disagree	Undecided	Agree	Strongly Agree	Agree	Undecided	Strongly Agree	Agree	Undecided	Agree	Strongly Disagree	Agree	Agree	Strongly Agree
96	41-46 years		Female	Christian	Married	Secondary	Public servant	Ewe	One	4+ visits	Urban	No	1	Agree	Undecided	Undecided	Undecided	Undecided	Undecided	Strongly Disagree	Undecided	Undecided	Agree	Agree	Undecided	Undecided	Undecided	Agree	Undecided	Agree	Agree	Agree	Undecided	Strongly Agree	Strongly Agree	Disagree	Strongly Disagree	Strongly Agree	Strongly Agree	Undecided	Undecided	Agree	Strongly Agree	Disagree	Undecided	Agree	Strongly Disagree	Undecided	Undecided
98	41-46 years		Female	Christian	Divorced/Separated	Tertiary	Public servant	Akan	Two	4+ visits	Urban	No	0	Strongly Agree	Strongly Agree	Strongly Agree	Strongly Agree	Strongly Disagree	Strongly Disagree	Strongly Agree	Strongly Agree	Strongly Agree	Strongly Agree	Strongly Agree	Disagree	Agree	Agree	Undecided	Agree	Strongly Agree	Strongly Agree	Strongly Agree	Agree	Agree	Undecided	Undecided	Undecided	Agree	Strongly Agree	Agree	Undecided	Strongly Agree	Strongly Agree	Undecided	Undecided	Strongly Disagree	Strongly Disagree	Agree	Undecided
99	25-40 years		Female	Muslim	Married	Tertiary	Public servant	Ewe	More than two	4+ visits	Urban	No	1	Strongly Agree	Agree	Agree	Agree	Strongly Disagree	Undecided	Agree	Agree	Agree	Strongly Agree	Agree	Agree	Agree	Agree	Undecided	Agree	Strongly Agree	Strongly Agree	Strongly Agree	Agree	Agree	Undecided	Agree	Agree	Agree	Agree	Undecided	Undecided	Strongly Agree	Agree	Undecided	Disagree	Strongly Disagree	Undecided	Undecided	Undecided
100	25-40 years		Female	Christian	Married	Tertiary	Unknown	Ewe	One	4+ visits	Urban	No	0	Strongly Agree	Undecided	Undecided	Agree	Disagree	Undecided	Agree	Agree	Agree	Strongly Agree	Agree	Agree	Undecided	Undecided	Undecided	Agree	Strongly Agree	Strongly Agree	Agree	Undecided	Undecided	Undecided	Agree	Agree	Agree	Agree	Agree	Undecided	Agree	Agree	Agree	Agree	Undecided	Disagree	Agree	Undecided
101	18-24 years		Female	Christian	Married	Secondary	Unknown	Akan	None	<4 visits	Urban	No	0	Strongly Agree	Undecided	Undecided	Undecided	Strongly Disagree	Strongly Disagree	Agree	Agree	Agree	Strongly Agree	Agree	Undecided	Undecided	Undecided	Undecided	Undecided	Strongly Agree	Strongly Agree	Strongly Agree	Undecided	Undecided	Undecided	Strongly Agree	Strongly Agree	Agree	Agree	Undecided	Undecided	Strongly Agree	Strongly Agree	Agree	Undecided	Disagree	Undecided	Undecided	Undecided
102	41-46 years		Female	Muslim	Married	Tertiary	Public servant	Akan	More than two	4+ visits	Urban	No	1	Strongly Agree	Undecided	Undecided	Agree	Disagree	Disagree	Undecided	Agree	Agree	Strongly Agree	Agree	Agree	Agree	Agree	Undecided	Agree	Strongly Agree	Strongly Agree	Agree	Undecided	Undecided	Undecided	Strongly Disagree	Disagree	Agree	Undecided	Disagree	Undecided	Agree	Agree	Undecided	Undecided	Undecided	Disagree	Undecided	Disagree
103	41-46 years		Female	Christian	Married	Tertiary	Public servant	Ewe	More than two	4+ visits	Urban	Yes	1	Strongly Agree	Strongly Agree	Agree	Agree	Disagree	Strongly Disagree	Agree	Agree	Agree	Strongly Agree	Agree	Agree	Agree	Agree	Agree	Agree	Strongly Agree	Strongly Agree	Agree	Undecided	Agree	Undecided	Agree	Agree	Disagree	Agree	Undecided	Undecided	Agree	Agree	Agree	Agree	Strongly Disagree	Strongly Disagree	Disagree	Undecided
104	25-40 years		Female	Christian	Divorced/Separated	Secondary	Unknown	Ewe	Two	4+ visits	Urban	No	0	Strongly Agree	Undecided	Undecided	Agree	Undecided	Undecided	Undecided	Undecided	Undecided	Strongly Agree	Undecided	Undecided	Undecided	Disagree	Disagree	Undecided	Agree	Agree	Agree	Agree	Undecided	Undecided	Agree	Agree	Agree	Agree	Undecided	Undecided	Agree	Agree	Agree	Disagree	Disagree	Disagree	Disagree	Disagree
106	25-40 years		Female	Muslim	Married	Tertiary	Unknown	Ewe	More than two	4+ visits	Urban	No	0	Strongly Agree	Undecided	Undecided	Agree	Undecided	Undecided	Undecided	Undecided	Agree	Strongly Agree	Undecided	Undecided	Undecided	Undecided	Undecided	Undecided	Strongly Agree	Strongly Agree	Agree	Undecided	Undecided	Undecided	Strongly Disagree	Agree	Agree	Agree	Undecided	Undecided	Agree	Agree	Agree	Undecided	Undecided	Strongly Disagree	Agree	Undecided
107	25-40 years		Female	Christian	Married	Basic	Self/Private employed	Ewe	More than two	4+ visits	Urban	Yes	0	Agree	Undecided	Undecided	Undecided	Disagree	Disagree	Disagree	Undecided	Undecided	Strongly Agree	Undecided	Undecided	Undecided	Undecided	Undecided	Undecided	Strongly Agree	Strongly Agree	Agree	Undecided	Undecided	Undecided	Agree	Agree	Agree	Agree	Undecided	Undecided	Agree	Agree	Agree	Agree	Undecided	Agree	Agree	Agree
109	18-24 years		Female	Christian	Single	Secondary	Self/Private employed	Ewe	None	<4 visits	Urban	Yes	0	Strongly Agree	Agree	Agree	Agree	Undecided	Disagree	Undecided	Agree	Agree	Strongly Agree	Agree	Undecided	Agree	Agree	Undecided	Agree	Strongly Agree	Strongly Agree	Agree	Agree	Undecided	Undecided	Agree	Agree	Agree	Agree	Undecided	Undecided	Agree	Strongly Agree	Undecided	Undecided	Disagree	Strongly Disagree	Disagree	Undecided
110	25-40 years		Female	Christian	Single	Secondary	Self/Private employed	Akan	Two	4+ visits	Urban	No	0	Strongly Agree	Agree	Agree	Agree	Strongly Disagree	Strongly Disagree	Undecided	Undecided	Agree	Strongly Agree	Undecided	Undecided	Undecided	Agree	Undecided	Undecided	Strongly Agree	Strongly Agree	Undecided	Undecided	Undecided	Undecided	Agree	Agree	Agree	Agree	Agree	Undecided	Agree	Agree	Agree	Agree	Disagree	Strongly Disagree	Disagree	Undecided
111	25-40 years		Female	Christian	Married	Secondary	Student/Unemployed	Ewe	Two	4+ visits	Urban	No	1	Strongly Agree	Agree	Agree	Agree	Strongly Disagree	Strongly Disagree	Undecided	Agree	Agree	Strongly Agree	Strongly Agree	Strongly Agree	Strongly Agree	Agree	Undecided	Agree	Strongly Agree	Strongly Agree	Agree	Undecided	Undecided	Undecided	Disagree	Disagree	Agree	Undecided	Disagree	Undecided	Disagree	Undecided	Undecided	Disagree	Disagree	Strongly Disagree	Disagree	Disagree
112	25-40 years		Female	Christian	Married	Secondary	Self/Private employed	Ewe	Two	4+ visits	Urban	No	0	Strongly Agree	Undecided	Agree	Agree	Strongly Disagree	Strongly Disagree	Disagree	Agree	Agree	Strongly Agree	Strongly Agree	Strongly Agree	Strongly Agree	Agree	Undecided	Undecided	Strongly Agree	Strongly Agree	Undecided	Strongly Disagree	Undecided	Undecided	Disagree	Disagree	Agree	Disagree	Disagree	Undecided	Disagree	Undecided	Undecided	Undecided	Disagree	Strongly Disagree	Disagree	Disagree
113	25-40 years		Female	Christian	Married	Tertiary	Public servant	Akan	Two	4+ visits	Urban	No	0	Strongly Agree	Agree	Agree	Agree	Agree	Undecided	Undecided	Undecided	Undecided	Agree	Strongly Agree	Agree	Disagree	Disagree	Disagree	Disagree	Disagree	Strongly Agree	Strongly Agree	Strongly Disagree	Undecided	Undecided	Agree	Agree	Undecided	Agree	Agree	Disagree	Agree	Agree	Agree	Agree	Undecided	Disagree	Undecided	Agree
114	25-40 years		Female	Christian	Married	Tertiary	Unknown	Ewe	More than two	4+ visits	Urban	Yes	1	Strongly Agree	Strongly Agree	Strongly Agree	Strongly Agree	Strongly Disagree	Strongly Disagree	Agree	Agree	Agree	Strongly Agree	Agree	Agree	Agree	Agree	Agree	Agree	Strongly Agree	Strongly Agree	Strongly Agree	Agree	Undecided	Undecided	Agree	Undecided	Agree	Strongly Agree	Undecided	Undecided	Strongly Agree	Strongly Agree	Undecided	Undecided	Strongly Disagree	Strongly Disagree	Agree	Agree
115	18-24 years		Female	Christian	Divorced/Separated	Basic	Self/Private employed	Akan	None	<4 visits	Rural	No	0	Strongly Agree	Undecided	Undecided	Undecided	Disagree	Disagree	Undecided	Undecided	Agree	Agree	Agree	Undecided	Disagree	Disagree	Undecided	Undecided	Agree	Agree	Agree	Undecided	Undecided	Undecided	Strongly Disagree	Agree	Agree	Strongly Agree	Undecided	Undecided	Strongly Agree	Strongly Agree	Agree	Agree	Agree	Disagree	Undecided	Undecided
116	25-40 years		Female	Christian	Married	Secondary	Public servant	Ewe	More than two	4+ visits	Urban	Yes	0	Strongly Agree	Undecided	Disagree	Agree	Strongly Disagree	Undecided	Agree	Disagree	Agree	Agree	Agree	Undecided	Agree	Disagree	Disagree	Disagree	Strongly Agree	Strongly Agree	Agree	Agree	Agree	Undecided	Strongly Disagree	Strongly Disagree	Strongly Agree	Agree	Strongly Agree	Undecided	Strongly Agree	Strongly Agree	Strongly Disagree	Strongly Agree	Undecided	Strongly Disagree	Agree	Agree
117	25-40 years		Female	Christian	Married	Secondary	Self/Private employed	Ewe	More than two	4+ visits	Urban	No	0	Strongly Agree	Strongly Agree	Agree	Agree	Disagree	Disagree	Agree	Agree	Undecided	Agree	Agree	Undecided	Agree	Disagree	Disagree	Disagree	Strongly Agree	Strongly Agree	Disagree	Disagree	Agree	Disagree	Strongly Disagree	Strongly Disagree	Agree	Strongly Agree	Undecided	Disagree	Strongly Agree	Strongly Agree	Disagree	Agree	Strongly Agree	Strongly Disagree	Agree	Strongly Agree
119	25-40 years		Female	Christian	Married	Tertiary	Public servant	Ewe	One	4+ visits	Estate	Yes	0	Strongly Agree	Undecided	Agree	Agree	Strongly Disagree	Undecided	Agree	Undecided	Strongly Agree	Strongly Agree	Strongly Agree	Undecided	Agree	Agree	Agree	Undecided	Strongly Agree	Strongly Agree	Strongly Agree	Strongly Agree	Undecided	Undecided	Strongly Disagree	Agree	Strongly Agree	Strongly Agree	Strongly Agree	Agree	Strongly Agree	Strongly Agree	Agree	Strongly Agree	Strongly Agree	Strongly Disagree	Agree	Agree
120	18-24 years		Female	Christian	Single	Tertiary	Unknown	Ewe	None	<4 visits	Estate	Yes	0	Undecided	Disagree	Undecided	Undecided	Strongly Disagree	Strongly Disagree	Strongly Agree	Strongly Agree	Strongly Agree	Agree	Agree	Undecided	Agree	Agree	Agree	Agree	Strongly Agree	Undecided	Undecided	Undecided	Strongly Agree	Strongly Agree	Strongly Disagree	Strongly Disagree	Agree	Strongly Agree	Strongly Agree	Undecided	Undecided	Agree	Disagree	Strongly Agree	Agree	Strongly Disagree	Undecided	Agree
121	>46 years	53	Female	Traditional	Widowed	None	Self/Private employed	Ewe	More than two	4+ visits	Rural	Yes	0	Strongly Agree	Undecided	Agree	Undecided	Agree	Agree	Undecided	Strongly Agree	Strongly Agree	Strongly Agree	Agree	Agree	Agree	Agree	Agree	Agree	Strongly Agree	Strongly Agree	Strongly Agree	Agree	Agree	Undecided	Strongly Disagree	Agree	Agree	Agree	Agree	Agree	Strongly Agree	Strongly Agree	Strongly Agree	Strongly Agree	Strongly Agree	Strongly Agree	Strongly Agree	Strongly Agree
122	25-40 years		Female	Christian	Married	Tertiary	Public servant	Ewe	One	<4 visits	Estate	Yes	0	Disagree	Undecided	Undecided	Undecided	Agree	Undecided	Undecided	Undecided	Undecided	Agree	Undecided	Undecided	Undecided	Agree	Agree	Agree	Undecided	Undecided	Undecided	Undecided	Undecided	Undecided	Disagree	Strongly Disagree	Disagree	Undecided	Undecided	Undecided	Disagree	Undecided	Disagree	Undecided	Undecided	Disagree	Undecided	Agree
123	25-40 years		Female	Christian	Divorced/Separated	Secondary	Self/Private employed	Ewe	One	<4 visits	Urban	Yes	0	Strongly Agree	Agree	Undecided	Undecided	Disagree	Disagree	Undecided	Undecided	Undecided	Agree	Agree	Undecided	Undecided	Disagree	Undecided	Undecided	Strongly Agree	Strongly Agree	Undecided	Undecided	Agree	Agree	Disagree	Agree	Agree	Agree	Agree	Undecided	Strongly Agree	Strongly Agree	Agree	Agree	Agree	Disagree	Undecided	Agree
124	18-24 years		Female	Christian	Single	Secondary	Self/Private employed	Ewe	One	<4 visits	Urban	Yes	0	Strongly Agree	Strongly Agree	Disagree	Disagree	Disagree	Disagree	Disagree	Agree	Agree	Agree	Agree	Agree	Agree	Disagree	Disagree	Agree	Agree	Strongly Agree	Agree	Agree	Agree	Disagree	Disagree	Disagree	Disagree	Agree	Agree	Disagree	Strongly Agree	Strongly Agree	Disagree	Disagree	Strongly Agree	Strongly Disagree	Strongly Disagree	Agree
125	25-40 years		Female	Christian	Married	Basic	Self/Private employed	Ewe	Two	<4 visits	Urban	Yes	0	Strongly Agree	Agree	Agree	Agree	Undecided	Strongly Disagree	Undecided	Undecided	Disagree	Agree	Agree	Undecided	Disagree	Undecided	Disagree	Disagree	Strongly Agree	Strongly Agree	Undecided	Undecided	Agree	Agree	Strongly Disagree	Agree	Agree	Agree	Agree	Undecided	Agree	Agree	Agree	Agree	Agree	Strongly Disagree	Undecided	Undecided
126	25-40 years		Female	Christian	Married	Tertiary	Unknown	Ewe	More than two	4+ visits	Urban	Yes	0	Strongly Agree	Undecided	Strongly Agree	Agree	Strongly Disagree	Strongly Disagree	Strongly Agree	Strongly Agree	Agree	Strongly Agree	Strongly Agree	Agree	Agree	Disagree	Agree	Agree	Strongly Agree	Strongly Agree	Agree	Agree	Strongly Agree	Agree	Disagree	Strongly Disagree	Agree	Agree	Strongly Agree	Agree	Strongly Agree	Strongly Agree	Strongly Disagree	Strongly Agree	Strongly Agree	Strongly Disagree	Disagree	Strongly Agree
127	25-40 years		Female	Christian	Single	Secondary	Self/Private employed	Ewe	One	4+ visits	Urban	No	0	Agree	Undecided	Agree	Strongly Agree	Strongly Disagree	Disagree	Strongly Disagree	Agree	Agree	Strongly Agree	Disagree	Undecided	Agree	Disagree	Agree	Agree	Agree	Strongly Agree	Agree	Agree	Undecided	Undecided	Agree	Strongly Agree	Agree	Agree	Undecided	Strongly Disagree	Agree	Strongly Agree	Strongly Agree	Agree	Undecided	Agree	Agree	Strongly Agree
128	25-40 years		Female	Christian	Married	Secondary	Unknown	Ewe	One	4+ visits	Urban	No	0	Strongly Agree	Undecided	Undecided	Undecided	Disagree	Strongly Disagree	Strongly Disagree	Undecided	Undecided	Undecided	Agree	Disagree	Agree	Disagree	Agree	Disagree	Strongly Agree	Strongly Agree	Strongly Agree	Disagree	Undecided	Undecided	Undecided	Agree	Strongly Agree	Agree	Strongly Agree	Undecided	Agree	Agree	Agree	Strongly Agree	Undecided	Disagree	Disagree	Agree
129	25-40 years		Female	Christian	Married	Basic	Self/Private employed	Ewe	Two	4+ visits	Urban	Yes	0	Agree	Agree	Undecided	Disagree	Agree	Strongly Disagree	Strongly Agree	Agree	Strongly Agree	Strongly Agree	Agree	Disagree	Agree	Strongly Agree	Strongly Agree	Strongly Agree	Strongly Agree	Strongly Agree	Agree	Undecided	Undecided	Undecided	Disagree	Agree	Strongly Agree	Strongly Agree	Undecided	Undecided	Agree	Agree	Agree	Undecided	Undecided	Agree	Strongly Agree	Strongly Agree
130	25-40 years		Female	Christian	Single	Tertiary	Unknown	Ewe	None	<4 visits	Rural	No	0	Strongly Agree	Strongly Disagree	Undecided	Strongly Agree	Strongly Disagree	Strongly Disagree	Undecided	Strongly Disagree	Undecided	Strongly Agree	Strongly Agree	Strongly Disagree	Undecided	Strongly Agree	Strongly Disagree	Undecided	Strongly Agree	Strongly Agree	Strongly Agree	Agree	Undecided	Undecided	Strongly Disagree	Disagree	Strongly Agree	Strongly Agree	Strongly Agree	Agree	Agree	Strongly Agree	Disagree	Agree	Strongly Agree	Strongly Disagree	Strongly Agree	Agree
131	25-40 years		Female	Christian	Married	Secondary	Unknown	Ewe	Two	4+ visits	Urban	No	0	Agree	Undecided	Strongly Agree	Agree	Agree	Undecided	Strongly Agree	Strongly Agree	Strongly Agree	Strongly Agree	Strongly Agree	Agree	Agree	Agree	Undecided	Undecided	Agree	Disagree	Undecided	Undecided	Undecided	Agree	Agree	Strongly Agree	Strongly Agree	Strongly Agree	Strongly Agree	Agree	Agree	Agree	Agree	Agree	Agree	Strongly Disagree	Undecided	Agree
132	18-24 years		Female	Christian	Single	Secondary	Unknown	Ewe	None	<4 visits	Urban	No	0	Agree	Undecided	Strongly Agree	Strongly Agree	Agree	Undecided	Agree	Undecided	Strongly Agree	Strongly Agree	Strongly Agree	Strongly Agree	Undecided	Undecided	Agree	Agree	Agree	Strongly Agree	Agree	Agree	Agree	Agree	Strongly Agree	Strongly Agree	Strongly Agree	Agree	Undecided	Agree	Agree	Agree	Agree	Undecided	Undecided	Agree	Disagree	Undecided
133	25-40 years		Female	Christian	Single	Basic	Unknown	Ewe	One	4+ visits	Rural	No	0	Agree	Undecided	Undecided	Strongly Agree	Strongly Agree	Strongly Agree	Strongly Agree	Strongly Agree	Strongly Agree	Strongly Agree	Strongly Agree	Strongly Agree	Strongly Agree	Agree	Undecided	Disagree	Strongly Disagree	Undecided	Disagree	Agree	Strongly Agree	Strongly Agree	Strongly Agree	Strongly Agree	Strongly Agree	Agree	Undecided	Disagree	Agree	Strongly Agree	Agree	Agree	Agree	Agree	Agree	Strongly Agree
134	18-24 years		Female	Christian	Married	Tertiary	Unknown	Ewe	One	4+ visits	Rural	No	0	Strongly Agree	Strongly Agree	Strongly Agree	Agree	Undecided	Disagree	Strongly Disagree	Disagree	Undecided	Strongly Agree	Strongly Agree	Strongly Agree	Agree	Agree	Agree	Strongly Agree	Strongly Agree	Agree	Undecided	Undecided	Undecided	Agree	Agree	Strongly Agree	Strongly Agree	Strongly Agree	Strongly Agree	Agree	Agree	Undecided	Undecided	Disagree	Undecided	Undecided	Undecided	Undecided
135	25-40 years		Female	Christian	Married	Tertiary	Public servant	Ewe	One	4+ visits	Urban	Yes	0	Agree	Undecided	Undecided	Strongly Disagree	Strongly Disagree	Strongly Disagree	Undecided	Undecided	Undecided	Agree	Disagree	Disagree	Strongly Disagree	Strongly Disagree	Undecided	Strongly Disagree	Strongly Disagree	Strongly Disagree	Agree	Undecided	Undecided	Agree	Disagree	Disagree	Agree	Strongly Disagree	Strongly Disagree	Disagree	Strongly Disagree	Strongly Disagree	Undecided	Agree	Strongly Disagree	Disagree	Undecided	Undecided
136	18-24 years		Female	Christian	Single	Basic	Unknown	Ewe	One	4+ visits	Rural	No	0	Undecided	Undecided	Agree	Agree	Agree	Agree	Undecided	Undecided	Undecided	Agree	Agree	Undecided	Undecided	Agree	Undecided	Undecided	Agree	Agree	Undecided	Undecided	Undecided	Undecided	Agree	Disagree	Undecided	Disagree	Undecided	Undecided	Disagree	Agree	Disagree	Undecided	Disagree	Undecided	Undecided	Undecided
137	41-46 years		Female	Christian	Married	Tertiary	Unknown	Ewe	More than two	4+ visits	Urban	Yes	1	Strongly Agree	Strongly Disagree	Agree	Strongly Agree	Strongly Disagree	Strongly Disagree	Agree	Agree	Agree	Strongly Agree	Agree	Strongly Disagree	Strongly Agree	Undecided	Disagree	Disagree	Strongly Agree	Agree	Strongly Disagree	Strongly Disagree	Strongly Agree	Agree	Strongly Disagree	Strongly Disagree	Strongly Agree	Strongly Agree	Strongly Agree	Strongly Agree	Strongly Agree	Strongly Agree	Strongly Disagree	Agree	Strongly Agree	Strongly Disagree	Disagree	Strongly Agree
138	18-24 years		Female	Christian	Married	Secondary	Unknown	Ewe	None	4+ visits	Rural	Yes	0	Undecided	Disagree	Agree	Disagree	Disagree	Undecided	Disagree	Disagree	Undecided	Agree	Agree	Undecided	Undecided	Agree	Undecided	Undecided	Agree	Agree	Agree	Disagree	Undecided	Undecided	Agree	Disagree	Disagree	Agree	Disagree	Undecided	Disagree	Strongly Agree	Agree	Disagree	Disagree	Disagree	Disagree	Disagree
139	25-40 years		Female	Christian	Married	Tertiary	Public servant	Ewe	None	4+ visits	Urban	Yes	0	Strongly Agree	Disagree	Disagree	Agree	Strongly Disagree	Strongly Disagree	Strongly Disagree	Strongly Disagree	Disagree	Disagree	Strongly Disagree	Strongly Disagree	Disagree	Disagree	Disagree	Disagree	Agree	Strongly Disagree	Agree	Undecided	Undecided	Disagree	Strongly Disagree	Disagree	Agree	Strongly Agree	Strongly Agree	Strongly Disagree	Agree	Agree	Disagree	Strongly Agree	Agree	Undecided	Undecided	Agree
140	25-40 years		Female	Christian	Married	Tertiary	Public servant	Ewe	One	4+ visits	Rural	Yes	0	Agree	Disagree	Agree	Agree	Agree	Undecided	Agree	Agree	Agree	Agree	Strongly Agree	Undecided	Agree	Undecided	Undecided	Agree	Agree	Agree	Agree	Agree	Undecided	Undecided	Disagree	Disagree	Agree	Agree	Agree	Agree	Agree	Agree	Disagree	Agree	Agree	Disagree	Undecided	Agree
141	25-40 years		Female	Christian	Married	Tertiary	Public servant	Ewe	Two	4+ visits	Urban	No	0	Strongly Agree	Undecided	Undecided	Disagree	Disagree	Disagree	Disagree	Disagree	Disagree	Disagree	Agree	Agree	Undecided	Undecided	Undecided	Undecided	Strongly Agree	Strongly Agree	Agree	Undecided	Undecided	Undecided	Strongly Disagree	Strongly Disagree	Strongly Agree	Strongly Agree	Strongly Agree	Agree	Agree	Agree	Disagree	Strongly Agree	Strongly Agree	Strongly Disagree	Disagree	Strongly Agree
142	25-40 years		Female	Christian	Married	Basic	Self/Private employed	Ga	One	4+ visits	Rural	No	0	Agree	Undecided	Undecided	Undecided	Undecided	Undecided	Undecided	Undecided	Undecided	Undecided	Undecided	Undecided	Undecided	Undecided	Undecided	Agree	Agree	Agree	Agree	Undecided	Undecided	Undecided	Agree	Agree	Undecided	Agree	Agree	Agree	Agree	Agree	Agree	Disagree	Disagree	Disagree	Disagree	Strongly Disagree
144	25-40 years		Female	Christian	Married	Tertiary	Public servant	Ewe	None	<4 visits	Rural	No	0	Strongly Agree	Strongly Disagree	Agree	Disagree	Strongly Disagree	Strongly Disagree	Undecided	Undecided	Disagree	Strongly Agree	Strongly Agree	Strongly Disagree	Strongly Agree	Strongly Agree	Undecided	Undecided	Strongly Agree	Strongly Agree	Strongly Agree	Strongly Agree	Strongly Agree	Strongly Agree	Strongly Disagree	Strongly Disagree	Strongly Agree	Strongly Agree	Agree	Undecided	Agree	Strongly Agree	Strongly Disagree	Agree	Disagree	Strongly Disagree	Disagree	Agree
145	18-24 years		Female	Christian	Married	Tertiary	Public servant	Ewe	None	<4 visits	Urban	No	0	Strongly Disagree	Strongly Agree	Strongly Agree	Strongly Agree	Strongly Disagree	Strongly Agree	Agree	Undecided	Undecided	Agree	Disagree	Strongly Agree	Agree	Strongly Agree	Agree	Strongly Agree	Strongly Agree	Undecided	Undecided	Strongly Agree	Undecided	Undecided	Strongly Disagree	Undecided	Strongly Agree	Strongly Agree	Agree	Strongly Agree	Strongly Agree	Strongly Agree	Undecided	Agree	Undecided	Strongly Disagree	Strongly Agree	Agree
146	25-40 years		Female	Christian	Married	Basic	Self/Private employed	Akan	More than two	4+ visits	Rural	No	0	Strongly Agree	Strongly Agree	Strongly Agree	Undecided	Strongly Agree	Undecided	Undecided	Undecided	Agree	Agree	Agree	Undecided	Agree	Undecided	Undecided	Undecided	Agree	Agree	Undecided	Strongly Agree	Agree	Agree	Strongly Disagree	Agree	Agree	Agree	Agree	Undecided	Strongly Agree	Agree	Agree	Agree	Strongly Agree	Agree	Agree	Agree
148	25-40 years		Female	Christian	Married	Secondary	Public servant	Ewe	One	4+ visits	Urban	No	0	Strongly Agree	Agree	Agree	Agree	Agree	Agree	Agree	Agree	Agree	Strongly Agree	Strongly Agree	Undecided	Agree	Undecided	Undecided	Undecided	Undecided	Undecided	Undecided	Agree	Undecided	Agree	Undecided	Agree	Undecided	Agree	Agree	Agree	Agree	Agree	Agree	Agree	Disagree	Disagree	Strongly Disagree	Strongly Disagree
149	25-40 years		Female	Christian	Married	Tertiary	Unknown	Ga	Two	4+ visits	Urban	Yes	0	Agree	Agree	Strongly Agree	Agree	Agree	Undecided	Strongly Agree	Strongly Agree	Strongly Agree	Strongly Agree	Strongly Agree	Strongly Agree	Strongly Agree	Agree	Agree	Agree	Strongly Agree	Agree	Strongly Agree	Agree	Undecided	Undecided	Disagree	Strongly Agree	Strongly Agree	Strongly Agree	Strongly Agree	Undecided	Strongly Agree	Strongly Agree	Agree	Agree	Agree	Agree	Undecided	Strongly Agree
150	41-46 years		Male	Christian	Married	Tertiary	Public servant	Ga	Two	<4 visits	Urban	Yes	0	Agree	Undecided	Strongly Agree	Undecided	Agree	Undecided	Strongly Agree	Agree	Strongly Agree	Agree	Agree	Agree	Agree	Strongly Agree	Strongly Agree	Undecided	Agree	Undecided	Strongly Agree	Agree	Undecided	Agree	Undecided	Agree	Agree	Agree	Strongly Agree	Strongly Agree	Strongly Agree	Strongly Agree	Strongly Agree	Strongly Agree	Strongly Agree	Strongly Disagree	Undecided	Undecided
151	25-40 years		Female	Christian	Married	Basic	Self/Private employed	Akan	One	4+ visits	Urban	Yes	0	Strongly Agree	Agree	Undecided	Agree	Strongly Agree	Agree	Strongly Agree	Undecided	Strongly Agree	Strongly Agree	Agree	Agree	Agree	Agree	Undecided	Undecided	Agree	Strongly Agree	Agree	Undecided	Undecided	Undecided	Undecided	Undecided	Agree	Undecided	Agree	Strongly Agree	Agree	Agree	Strongly Agree	Strongly Agree	Undecided	Strongly Disagree	Undecided	Undecided
152	>46 years	53	Female	Christian	Widowed	Basic	Public servant	Ga	More than two	4+ visits	Urban	Yes	0	Strongly Agree	Undecided	Undecided	Undecided	Strongly Disagree	Strongly Disagree	Undecided	Undecided	Agree	Agree	Agree	Agree	Agree	Agree	Agree	Agree	Undecided	Undecided	Undecided	Undecided	Agree	Agree	Strongly Disagree	Undecided	Agree	Agree	Undecided	Strongly Disagree	Strongly Agree	Strongly Agree	Agree	Strongly Agree	Strongly Agree	Strongly Disagree	Agree	Agree
153	25-40 years		Female	Christian	Married	Tertiary	Public servant	Ga	One	4+ visits	Urban	Yes	0	Strongly Agree	Strongly Disagree	Strongly Agree	Strongly Disagree	Strongly Disagree	Strongly Disagree	Strongly Disagree	Strongly Disagree	Strongly Disagree	Strongly Disagree	Strongly Disagree	Undecided	Undecided	Undecided	Disagree	Disagree	Strongly Agree	Strongly Agree	Disagree	Disagree	Agree	Agree	Strongly Disagree	Agree	Agree	Agree	Agree	Disagree	Strongly Disagree	Strongly Agree	Agree	Agree	Strongly Agree	Strongly Disagree	Strongly Disagree	Agree
154	25-40 years		Male	Christian	Married	Tertiary	Self/Private employed	Ewe	One	<4 visits	Urban	No	0	Agree	Undecided	Strongly Disagree	Agree	Strongly Disagree	Strongly Disagree	Strongly Disagree	Strongly Disagree	Strongly Disagree	Undecided	Strongly Agree	Strongly Disagree	Strongly Disagree	Agree	Agree	Undecided	Agree	Agree	Agree	Agree	Agree	Undecided	Undecided	Agree	Agree	Agree	Agree	Undecided	Agree	Agree	Agree	Undecided	Undecided	Undecided	Agree	Agree
155	25-40 years		Female	Christian	Divorced/Separated	Secondary	Public servant	Akan	Two	4+ visits	Rural	No	0	Agree	Agree	Agree	Agree	Undecided	Agree	Undecided	Undecided	Undecided	Agree	Agree	Agree	Agree	Agree	Agree	Disagree	Agree	Agree	Agree	Undecided	Agree	Undecided	Disagree	Agree	Agree	Agree	Agree	Undecided	Agree	Strongly Agree	Agree	Agree	Strongly Agree	Disagree	Undecided	Agree
156	41-46 years		Female	Christian	Married	Basic	Self/Private employed	Ewe	Two	4+ visits	Urban	No	0	Strongly Agree	Agree	Agree	Undecided	Disagree	Disagree	Disagree	Disagree	Undecided	Agree	Agree	Disagree	Agree	Agree	Agree	Agree	Agree	Agree	Agree	Undecided	Undecided	Undecided	Strongly Disagree	Undecided	Undecided	Agree	Strongly Disagree	Strongly Disagree	Strongly Agree	Strongly Agree	Agree	Agree	Agree	Disagree	Strongly Disagree	Undecided
157	25-40 years		Female	Christian	Married	Secondary	Self/Private employed	Ewe	Two	4+ visits	Rural	No	0	Agree	Undecided	Undecided	Undecided	Undecided	Agree	Undecided	Undecided	Undecided	Agree	Undecided	Undecided	Undecided	Undecided	Undecided	Undecided	Agree	Agree	Agree	Agree	Undecided	Undecided	Strongly Disagree	Strongly Disagree	Undecided	Undecided	Undecided	Undecided	Agree	Agree	Agree	Undecided	Strongly Disagree	Strongly Disagree	Undecided	Agree
158	25-40 years		Female	Christian	Single	Secondary	Self/Private employed	Ewe	One	4+ visits	Rural	No	0	Strongly Agree	Undecided	Undecided	Undecided	Undecided	Undecided	Undecided	Undecided	Undecided	Agree	Undecided	Undecided	Undecided	Agree	Undecided	Undecided	Agree	Agree	Agree	Agree	Undecided	Undecided	Agree	Agree	Agree	Agree	Agree	Agree	Agree	Agree	Agree	Undecided	Strongly Disagree	Strongly Disagree	Undecided	Agree
159	25-40 years		Female	Christian	Single	Secondary	Unknown	Akan	One	4+ visits	Rural	Yes	0	Agree	Undecided	Agree	Agree	Undecided	Agree	Undecided	Agree	Undecided	Agree	Undecided	Undecided	Undecided	Agree	Undecided	Agree	Agree	Agree	Agree	Agree	Undecided	Undecided	Strongly Disagree	Strongly Disagree	Disagree	Strongly Agree	Agree	Agree	Strongly Agree	Agree	Disagree	Undecided	Undecided	Strongly Disagree	Undecided	Agree
160	25-40 years		Female	Christian	Married	Tertiary	Public servant	Ewe	More than two	4+ visits	Rural	No	0	Strongly Agree	Undecided	Undecided	Undecided	Undecided	Undecided	Agree	Agree	Agree	Agree	Undecided	Undecided	Undecided	Undecided	Undecided	Undecided	Agree	Agree	Agree	Agree	Undecided	Undecided	Agree	Undecided	Undecided	Agree	Agree	Undecided	Agree	Agree	Undecided	Undecided	Agree	Strongly Disagree	Undecided	Agree
161	25-40 years		Female	Christian	Married	Basic	Self/Private employed	Ewe	One	4+ visits	Rural	No	0	Undecided	Undecided	Undecided	Undecided	Undecided	Undecided	Undecided	Undecided	Undecided	Agree	Undecided	Undecided	Undecided	Undecided	Undecided	Undecided	Agree	Agree	Agree	Undecided	Undecided	Undecided	Undecided	Agree	Undecided	Agree	Agree	Undecided	Agree	Agree	Undecided	Undecided	Strongly Disagree	Strongly Disagree	Undecided	Agree
162	41-46 years		Female	Christian	Married	Basic	Self/Private employed	Ewe	More than two	4+ visits	Rural	No	0	Strongly Agree	Disagree	Disagree	Disagree	Disagree	Disagree	Undecided	Undecided	Undecided	Agree	Disagree	Disagree	Disagree	Disagree	Undecided	Undecided	Agree	Agree	Undecided	Undecided	Undecided	Undecided	Strongly Agree	Strongly Disagree	Agree	Agree	Agree	Undecided	Strongly Agree	Strongly Agree	Undecided	Agree	Agree	Strongly Disagree	Strongly Disagree	Agree
163	25-40 years		Male	Christian	Married	Tertiary	Public servant	Ewe	Two	<4 visits	Urban	No	0	Strongly Agree	Agree	Agree	Agree	Strongly Disagree	Undecided	Agree	Agree	Agree	Strongly Agree	Agree	Agree	Strongly Agree	Agree	Agree	Agree	Agree	Agree	Undecided	Disagree	Undecided	Undecided	Agree	Strongly Agree	Strongly Agree	Strongly Agree	Disagree	Undecided	Agree	Strongly Agree	Strongly Agree	Undecided	Agree	Strongly Disagree	Agree	Agree
164	25-40 years		Female	Christian	Married	Basic	Self/Private employed	Ewe	Two	4+ visits	Urban	Yes	0	Agree	Undecided	Agree	Undecided	Undecided	Undecided	Undecided	Undecided	Undecided	Agree	Agree	Undecided	Undecided	Agree	Undecided	Undecided	Strongly Agree	Strongly Agree	Undecided	Undecided	Undecided	Agree	Disagree	Agree	Undecided	Agree	Agree	Disagree	Strongly Agree	Strongly Agree	Agree	Agree	Strongly Agree	Strongly Disagree	Agree	Agree
165	25-40 years		Female	Traditional	Married	Secondary	Unknown	Akan	More than two	4+ visits	Urban	Yes	1	Agree	Undecided	Undecided	Undecided	Undecided	Agree	Agree	Agree	Agree	Agree	Agree	Agree	Agree	Agree	Agree	Agree	Agree	Agree	Agree	Agree	Undecided	Agree	Disagree	Agree	Agree	Agree	Agree	Strongly Agree	Agree	Agree	Agree	Agree	Agree	Agree	Agree	Agree
166	25-40 years		Female	Christian	Married	Secondary	Unknown	Ewe	One	4+ visits	Urban	No	0	Strongly Agree	Undecided	Undecided	Undecided	Agree	Disagree	Agree	Agree	Agree	Agree	Strongly Agree	Undecided	Undecided	Agree	Agree	Undecided	Agree	Agree	Undecided	Agree	Undecided	Undecided	Disagree	Agree	Agree	Agree	Undecided	Undecided	Undecided	Undecided	Undecided	Undecided	Agree	Strongly Agree	Undecided	Agree
167	>46 years	60	Female	Traditional	Widowed	None	Self/Private employed	Ewe	More than two	<4 visits	Rural	Yes	1	Strongly Agree	Undecided	Undecided	Undecided	Disagree	Disagree	Undecided	Undecided	Undecided	Undecided	Agree	Undecided	Undecided	Agree	Undecided	Undecided	Agree	Agree	Undecided	Undecided	Agree	Agree	Strongly Disagree	Agree	Agree	Agree	Agree	Undecided	Strongly Agree	Strongly Agree	Agree	Agree	Agree	Disagree	Agree	Agree
168	25-40 years		Female	Muslim	Married	Basic	Self/Private employed	Ewe	More than two	4+ visits	Rural	No	0	Agree	Disagree	Undecided	Disagree	Disagree	Disagree	Undecided	Undecided	Agree	Agree	Agree	Undecided	Undecided	Agree	Undecided	Undecided	Agree	Agree	Undecided	Strongly Agree	Agree	Agree	Disagree	Agree	Agree	Agree	Agree	Undecided	Agree	Agree	Disagree	Disagree	Disagree	Disagree	Undecided	Undecided
169	25-40 years		Female	Christian	Married	Basic	Unknown	Ewe	Two	4+ visits	Rural	No	0	Agree	Undecided	Undecided	Undecided	Undecided	Agree	Undecided	Agree	Strongly Agree	Strongly Agree	Strongly Agree	Strongly Agree	Strongly Agree	Agree	Agree	Strongly Agree	Strongly Agree	Agree	Undecided	Undecided	Agree	Agree	Undecided	Agree	Undecided	Agree	Undecided	Strongly Agree	Agree	Undecided	Undecided	Agree	Undecided	Undecided	Undecided	Undecided
170	41-46 years		Female	Muslim	Married	Tertiary	Unknown	Others	One	4+ visits	Rural	No	0	Agree	Undecided	Undecided	Undecided	Undecided	Undecided	Undecided	Undecided	Undecided	Agree	Agree	Undecided	Undecided	Agree	Undecided	Agree	Agree	Agree	Agree	Agree	Agree	Agree	Strongly Agree	Strongly Agree	Strongly Agree	Agree	Agree	Strongly Agree	Agree	Undecided	Agree	Agree	Agree	Undecided	Agree	Undecided
171	41-46 years		Female	Muslim	Married	Basic	Unknown	Others	Two	4+ visits	Rural	No	0	Strongly Agree	Undecided	Undecided	Undecided	Undecided	Undecided	Undecided	Undecided	Agree	Undecided	Undecided	Undecided	Agree	Undecided	Undecided	Agree	Agree	Undecided	Undecided	Undecided	Undecided	Undecided	Strongly Disagree	Agree	Agree	Strongly Agree	Strongly Agree	Agree	Strongly Agree	Strongly Agree	Strongly Agree	Strongly Agree	Strongly Agree	Strongly Agree	Agree	Strongly Agree
172	25-40 years		Female	Christian	Married	Tertiary	Unknown	Akan	Two	4+ visits	Urban	No	0	Strongly Agree	Agree	Agree	Agree	Undecided	Undecided	Undecided	Agree	Agree	Agree	Agree	Undecided	Agree	Agree	Agree	Agree	Agree	Agree	Agree	Undecided	Undecided	Undecided	Agree	Agree	Agree	Agree	Undecided	Undecided	Agree	Agree	Agree	Undecided	Disagree	Disagree	Disagree	Undecided
173	>46 years	48	Female	Christian	Widowed	Tertiary	Unknown	Ewe	More than two	4+ visits	Urban	No	0	Agree	Undecided	Agree	Agree	Undecided	Undecided	Undecided	Agree	Agree	Agree	Undecided	Undecided	Agree	Agree	Undecided	Agree	Agree	Agree	Agree	Agree	Undecided	Undecided	Agree	Agree	Agree	Agree	Agree	Undecided	Agree	Agree	Agree	Agree	Undecided	Undecided	Agree	Agree
175	25-40 years		Female	Christian	Single	Secondary	Unknown	Ewe	One	<4 visits	Urban	No	0	Agree	Undecided	Agree	Agree	Undecided	Undecided	Agree	Agree	Agree	Strongly Agree	Agree	Agree	Agree	Agree	Undecided	Agree	Agree	Agree	Agree	Agree	Undecided	Undecided	Agree	Agree	Agree	Agree	Undecided	Undecided	Agree	Agree	Undecided	Disagree	Disagree	Disagree	Agree	Agree
176	18-24 years		Female	Christian	Married	Secondary	Unknown	Ewe	One	4+ visits	Urban	No	0	Agree	Agree	Agree	Agree	Undecided	Undecided	Undecided	Agree	Agree	Strongly Agree	Agree	Undecided	Undecided	Undecided	Undecided	Agree	Strongly Agree	Agree	Agree	Agree	Agree	Agree	Agree	Agree	Agree	Agree	Agree	Undecided	Agree	Agree	Agree	Undecided	Disagree	Disagree	Undecided	Undecided
177	25-40 years		Male	Christian	Married	Tertiary	Public servant	Akan	More than two	<4 visits	Urban	Yes	0	Strongly Agree	Strongly Agree	Strongly Agree	Strongly Agree	Disagree	Undecided	Agree	Agree	Agree	Strongly Agree	Agree	Strongly Agree	Agree	Agree	Agree	Agree	Strongly Agree	Strongly Agree	Strongly Agree	Agree	Agree	Undecided	Undecided	Undecided	Agree	Strongly Agree	Agree	Undecided	Strongly Agree	Strongly Agree	Undecided	Undecided	Strongly Disagree	Strongly Disagree	Agree	Undecided
178	25-40 years		Female	Christian	Married	Secondary	Self/Private employed	Ewe	One	4+ visits	Urban	No	0	Strongly Agree	Undecided	Agree	Agree	Undecided	Undecided	Undecided	Undecided	Undecided	Agree	Agree	Undecided	Agree	Agree	Undecided	Agree	Agree	Agree	Undecided	Agree	Strongly Agree	Strongly Agree	Agree	Undecided	Agree	Agree	Undecided	Undecided	Agree	Strongly Agree	Agree	Strongly Agree	Agree	Agree	Agree	Agree
179	25-40 years		Female	Christian	Single	Secondary	Unknown	Ewe	One	<4 visits	Urban	No	0	Strongly Agree	Undecided	Undecided	Agree	Undecided	Undecided	Undecided	Undecided	Agree	Strongly Agree	Undecided	Undecided	Undecided	Undecided	Undecided	Strongly Agree	Strongly Agree	Strongly Agree	Strongly Agree	Undecided	Undecided	Undecided	Agree	Agree	Agree	Agree	Undecided	Undecided	Strongly Agree	Strongly Agree	Strongly Agree	Agree	Strongly Disagree	Strongly Disagree	Agree	Agree
180	25-40 years		Female	Muslim	Married	Secondary	Unknown	Ewe	Two	4+ visits	Rural	No	0	Strongly Agree	Undecided	Agree	Agree	Strongly Disagree	Undecided	Undecided	Undecided	Agree	Strongly Agree	Undecided	Undecided	Agree	Agree	Undecided	Undecided	Strongly Agree	Strongly Agree	Strongly Agree	Agree	Undecided	Undecided	Undecided	Agree	Undecided	Agree	Undecided	Undecided	Agree	Agree	Agree	Undecided	Undecided	Disagree	Undecided	Undecided
181	18-24 years		Female	Christian	Single	Secondary	Unknown	Ewe	One	4+ visits	Urban	No	0	Agree	Undecided	Undecided	Agree	Undecided	Undecided	Undecided	Undecided	Agree	Strongly Agree	Undecided	Undecided	Undecided	Undecided	Undecided	Agree	Strongly Agree	Strongly Agree	Agree	Agree	Undecided	Undecided	Agree	Agree	Agree	Agree	Undecided	Undecided	Agree	Agree	Agree	Agree	Undecided	Strongly Disagree	Agree	Agree
182	25-40 years		Female	Christian	Married	Tertiary	Public servant	Ewe	Two	4+ visits	Urban	Yes	1	Strongly Agree	Strongly Agree	Agree	Strongly Agree	Strongly Disagree	Strongly Disagree	Agree	Agree	Agree	Strongly Agree	Agree	Agree	Agree	Agree	Strongly Agree	Strongly Agree	Strongly Agree	Strongly Agree	Strongly Agree	Agree	Agree	Undecided	Undecided	Undecided	Agree	Agree	Undecided	Undecided	Strongly Agree	Undecided	Undecided	Undecided	Disagree	Undecided	Undecided	Undecided
183	25-40 years		Female	Christian	Married	Secondary	Self/Private employed	Ewe	Two	4+ visits	Rural	No	0	Agree	Agree	Agree	Agree	Undecided	Undecided	Agree	Agree	Disagree	Disagree	Disagree	Disagree	Undecided	Undecided	Disagree	Strongly Disagree	Agree	Agree	Agree	Undecided	Undecided	Undecided	Undecided	Disagree	Disagree	Undecided	Strongly Disagree	Strongly Disagree	Undecided	Undecided	Disagree	Undecided	Strongly Disagree	Strongly Disagree	Strongly Disagree	Strongly Disagree
184	18-24 years		Female	Traditional	Married	Secondary	Self/Private employed	Ewe	More than two	<4 visits	Rural	Yes	0	Disagree	Disagree	Agree	Strongly Disagree	Strongly Disagree	Agree	Agree	Strongly Agree	Agree	Strongly Disagree	Strongly Disagree	Agree	Undecided	Agree	Agree	Undecided	Agree	Strongly Disagree	Undecided	Agree	Agree	Strongly Disagree	Agree	Undecided	Undecided	Undecided	Undecided	Undecided	Agree	Undecided	Agree	Undecided	Agree	Strongly Agree	Disagree	Undecided
185	41-46 years		Female	Muslim	Married	Basic	Self/Private employed	Others	More than two	4+ visits	Rural	No	0	Agree	Undecided	Undecided	Undecided	Undecided	Undecided	Undecided	Undecided	Undecided	Agree	Agree	Undecided	Undecided	Strongly Agree	Agree	Undecided	Agree	Agree	Agree	Agree	Undecided	Undecided	Undecided	Strongly Disagree	Disagree	Agree	Undecided	Undecided	Agree	Agree	Undecided	Agree	Undecided	Strongly Disagree	Disagree	Undecided
186	41-46 years		Female	Christian	Divorced/Separated	Secondary	Self/Private employed	Ewe	Two	4+ visits	Rural	No	0	Strongly Agree	Agree	Agree	Agree	Disagree	Disagree	Undecided	Undecided	Undecided	Undecided	Disagree	Undecided	Undecided	Disagree	Undecided	Undecided	Agree	Agree	Agree	Agree	Undecided	Undecided	Undecided	Disagree	Strongly Disagree	Undecided	Agree	Undecided	Agree	Strongly Agree	Undecided	Agree	Undecided	Strongly Disagree	Strongly Disagree	Strongly Disagree
187	41-46 years		Female	Christian	Married	Basic	Self/Private employed	Ewe	Two	<4 visits	Rural	No	0	Agree	Undecided	Agree	Agree	Undecided	Undecided	Undecided	Agree	Undecided	Agree	Agree	Undecided	Undecided	Agree	Undecided	Agree	Agree	Agree	Agree	Agree	Undecided	Undecided	Strongly Disagree	Strongly Disagree	Disagree	Strongly Agree	Agree	Agree	Strongly Agree	Agree	Disagree	Undecided	Undecided	Strongly Disagree	Undecided	Agree
188	>46 years	55	Female	Christian	Widowed	None	Self/Private employed	Ewe	More than two	<4 visits	Rural	No	0	Strongly Agree	Undecided	Undecided	Undecided	Undecided	Undecided	Undecided	Undecided	Undecided	Agree	Agree	Undecided	Undecided	Agree	Undecided	Undecided	Agree	Agree	Agree	Agree	Undecided	Undecided	Undecided	Strongly Disagree	Disagree	Agree	Strongly Agree	Undecided	Disagree	Disagree	Agree	Agree	Undecided	Disagree	Disagree	Undecided
189	41-46 years		Female	Christian	Divorced/Separated	Secondary	Unknown	Ewe	Two	4+ visits	Rural	No	0	Agree	Undecided	Undecided	Undecided	Undecided	Disagree	Disagree	Disagree	Disagree	Disagree	Undecided	Undecided	Undecided	Disagree	Agree	Undecided	Strongly Agree	Strongly Agree	Strongly Agree	Strongly Agree	Undecided	Undecided	Undecided	Agree	Disagree	Agree	Undecided	Undecided	Disagree	Agree	Agree	Undecided	Undecided	Undecided	Disagree	Disagree
190	25-40 years		Female	Christian	Divorced/Separated	Basic	Self/Private employed	Ewe	Two	4+ visits	Rural	No	0	Agree	Undecided	Undecided	Undecided	Agree	Strongly Agree	Strongly Agree	Strongly Agree	Strongly Agree	Agree	Undecided	Undecided	Agree	Agree	Undecided	Strongly Agree	Strongly Agree	Strongly Agree	Strongly Agree	Strongly Agree	Undecided	Undecided	Undecided	Agree	Disagree	Agree	Undecided	Undecided	Agree	Agree	Undecided	Disagree	Agree	Undecided	Undecided	Agree
191	41-46 years		Female	Christian	Married	Secondary	Self/Private employed	Ewe	Two	4+ visits	Rural	No	0	Agree	Undecided	Undecided	Undecided	Undecided	Undecided	Undecided	Undecided	Undecided	Undecided	Undecided	Undecided	Undecided	Undecided	Undecided	Agree	Agree	Agree	Agree	Undecided	Undecided	Undecided	Agree	Agree	Undecided	Agree	Agree	Agree	Agree	Agree	Undecided	Disagree	Disagree	Disagree	Strongly Disagree	Strongly Disagree
192	18-24 years		Female	Christian	Married	Secondary	Self/Private employed	Ewe	One	4+ visits	Rural	No	0	Agree	Undecided	Agree	Undecided	Undecided	Disagree	Agree	Agree	Agree	Agree	Agree	Agree	Agree	Agree	Undecided	Agree	Agree	Agree	Strongly Agree	Undecided	Undecided	Undecided	Undecided	Disagree	Agree	Agree	Agree	Undecided	Disagree	Undecided	Undecided	Disagree	Disagree	Undecided	Agree	Agree
193	25-40 years		Female	Christian	Married	Secondary	Unknown	Ewe	Two	4+ visits	Rural	No	0	Strongly Agree	Strongly Disagree	Agree	Disagree	Strongly Disagree	Strongly Disagree	Undecided	Undecided	Disagree	Strongly Agree	Strongly Agree	Strongly Disagree	Strongly Agree	Strongly Agree	Undecided	Undecided	Strongly Agree	Strongly Agree	Strongly Agree	Strongly Agree	Strongly Agree	Strongly Agree	Strongly Disagree	Strongly Disagree	Strongly Agree	Strongly Agree	Agree	Undecided	Agree	Strongly Agree	Strongly Disagree	Agree	Disagree	Strongly Disagree	Disagree	Agree
194	25-40 years		Female	Christian	Married	Basic	Self/Private employed	Ewe	Two	4+ visits	Rural	No	0	Strongly Agree	Undecided	Undecided	Undecided	Disagree	Disagree	Undecided	Undecided	Undecided	Disagree	Disagree	Undecided	Undecided	Undecided	Undecided	Undecided	Agree	Agree	Agree	Agree	Undecided	Undecided	Disagree	Disagree	Disagree	Agree	Agree	Agree	Agree	Agree	Disagree	Strongly Agree	Undecided	Disagree	Disagree	Agree
195	25-40 years		Female	Christian	Single	Secondary	Unknown	Ewe	One	4+ visits	Rural	No	0	Strongly Disagree	Strongly Agree	Strongly Agree	Strongly Agree	Strongly Disagree	Strongly Agree	Agree	Undecided	Undecided	Agree	Disagree	Strongly Agree	Agree	Strongly Agree	Agree	Strongly Agree	Disagree	Undecided	Undecided	Strongly Agree	Undecided	Undecided	Strongly Disagree	Undecided	Strongly Agree	Strongly Agree	Agree	Strongly Agree	Strongly Agree	Strongly Agree	Disagree	Agree	Undecided	Strongly Disagree	Strongly Agree	Agree
196	25-40 years		Female	Muslim	Married	Secondary	Unknown	Ewe	Two	4+ visits	Rural	No	0	Strongly Agree	Undecided	Undecided	Undecided	Undecided	Undecided	Disagree	Disagree	Disagree	Disagree	Disagree	Undecided	Disagree	Undecided	Disagree	Undecided	Agree	Agree	Agree	Agree	Undecided	Undecided	Undecided	Strongly Disagree	Disagree	Agree	Agree	Undecided	Agree	Agree	Disagree	Agree	Undecided	Strongly Disagree	Disagree	Undecided
197	18-24 years		Female	Christian	Single	Secondary	Unknown	Ewe	None	<4 visits	Rural	No	0	Strongly Agree	Agree	Strongly Agree	Agree	Strongly Disagree	Strongly Disagree	Agree	Undecided	Agree	Strongly Agree	Agree	Disagree	Disagree	Strongly Agree	Agree	Agree	Strongly Agree	Strongly Agree	Disagree	Strongly Disagree	Strongly Agree	Strongly Agree	Strongly Disagree	Strongly Disagree	Strongly Agree	Strongly Agree	Strongly Agree	Strongly Agree	Agree	Strongly Agree	Disagree	Strongly Agree	Disagree	Strongly Disagree	Disagree	Agree
198	25-40 years		Female	Muslim	Married	Tertiary	Unknown	Ewe	More than two	4+ visits	Urban	No	0	Strongly Agree	Undecided	Undecided	Agree	Undecided	Undecided	Undecided	Undecided	Agree	Strongly Agree	Undecided	Undecided	Undecided	Undecided	Undecided	Undecided	Strongly Agree	Strongly Agree	Agree	Undecided	Undecided	Undecided	Strongly Disagree	Agree	Agree	Agree	Undecided	Undecided	Agree	Agree	Agree	Undecided	Undecided	Strongly Disagree	Agree	Undecided
199	25-40 years		Female	Christian	Married	Basic	Self/Private employed	Ewe	More than two	4+ visits	Urban	No	0	Agree	Undecided	Undecided	Undecided	Disagree	Disagree	Disagree	Undecided	Undecided	Strongly Agree	Undecided	Undecided	Undecided	Undecided	Undecided	Undecided	Strongly Agree	Strongly Agree	Agree	Undecided	Undecided	Undecided	Agree	Agree	Agree	Agree	Undecided	Undecided	Agree	Agree	Agree	Agree	Undecided	Agree	Agree	Agree
200	41-46 years		Female	Christian	Married	Tertiary	Public servant	Others	Two	4+ visits	Urban	Yes	0	Strongly Agree	Strongly Agree	Undecided	Agree	Strongly Disagree	Strongly Disagree	Disagree	Undecided	Agree	Strongly Agree	Agree	Undecided	Disagree	Undecided	Undecided	Agree	Strongly Agree	Strongly Agree	Undecided	Undecided	Agree	Undecided	Agree	Agree	Agree	Strongly Agree	Agree	Disagree	Agree	Agree	Agree	Agree	Undecided	Disagree	Agree	Agree
31	41-46 years		Female	Christian	Married	Tertiary	Public servant	Ewe	Two	4+ visits	Urban	Yes	0	Strongly Agree	Strongly Agree	Strongly Agree	Strongly Agree	Agree	Agree	Agree	Agree	Agree	Disagree	Strongly Agree	Agree	Agree	Disagree	Agree	Agree	Agree	Agree	Agree	Agree	Agree	Strongly Agree	Strongly Disagree	Strongly Disagree	Agree	Strongly Agree	Agree	Agree	Strongly Agree	Strongly Agree	Agree	Agree	Strongly Disagree	Strongly Disagree	Disagree	Agree
52	25-40 years		Female	Christian	Married	Secondary	Self/Private employed	Ewe	Two	4+ visits	Estate	Yes	0	Agree	Disagree	Disagree	Undecided	Strongly Disagree	Strongly Disagree	Agree	Agree	Undecided	Agree	Agree	Undecided	Agree	Agree	Undecided	Undecided	Agree	Undecided	Agree	Disagree	Undecided	Disagree	Undecided	Disagree	Agree	Agree	Agree	Undecided	Agree	Agree	Undecided	Undecided	Undecided	Disagree	Disagree	Undecided
[truncated: 10 more columns]
